# Sub-millimeter fMRI reveals multiple topographical digit representations that form action maps in human motor cortex

Laurentius Huber<sup>1,✉</sup>, Emily S. Finn<sup>1</sup>, Daniel A. Handwerker<sup>1</sup>, Marlene Bönstrup<sup>2</sup>, Daniel Glen<sup>1</sup>, Sriranga Kashyap<sup>3</sup>, Dimo Ivanov<sup>3</sup>, Natalia Petridou<sup>4</sup>, Sean Marrett<sup>1</sup>, Jozien Goense<sup>5</sup>, Benedikt A. Poser<sup>3</sup>, and Peter A. Bandettini<sup>1</sup>

<sup>1</sup>NIMH, NIH, Bethesda, MD, USA

<sup>2</sup>NINDS, NIH, Bethesda, MD, USA

<sup>3</sup>Maastricht Brain Imaging Centre, Maastricht University, Maastricht, The Netherlands

<sup>4</sup>University Medical Center Utrecht, Center for Image Sciences, Utrecht, The Netherlands

<sup>5</sup>School of Psychology, and Institute of Neuroscience and Psychology, University of Glasgow, Glasgow, UK

The human brain coordinates a wide variety of motor activities. On a large scale, the cortical motor system is topographically organized such that neighboring body parts are represented by neighboring brain areas. This homunculus-like somatotopic organization along the central sulcus has been observed using neuroimaging for large body parts such as the face, hands and feet. However, on a finer scale, invasive electrical stimulation studies show deviations from this somatotopic organization that suggest an organizing principle based on motor action. It has not been clear how the action-map organization principle of the motor cortex in the mesoscopic (sub-millimeter) regime integrates into a body map organization principle on a macroscopic scale (cm). Here we developed and applied advanced mesoscopic (sub-millimeter) fMRI and analysis methodology to non-invasively investigate the functional organization topography across columnar and laminar structures in humans. We find that individual fingers have multiple mirrored representations in the primary motor cortex depending on the movements they are involved in. We find that individual digits have cortical representations up to 3 mm apart from each other arranged in a column-like fashion. These representations are differentially engaged depending on whether the digits' muscles are used for different motor actions such as flexion movements like grasping a ball or retraction movements like releasing a ball. This research provides a starting point for non-invasive investigation of mesoscale topography across layers and columns of the human cortex and bridges the gap between invasive electrophysiological investigations and large coverage non-invasive neuroimaging.

high-resolution fMRI | motor cortex | cortical layers | cortical columns | VASO

Correspondence: [renzohuber@gmail.com](mailto:renzohuber@gmail.com)

## Introduction

The human repertoire of motor activity spans an immense variety of movements, and most of our interactions with the environment involve some degree of movement. Voluntary movement is controlled by the central nervous system, particularly the brain's motor cortex. The primary motor cortex is

organized according to the principle of somatotopy, whereby areas specializing in different body parts are arranged in a predictable order. Penfield and colleagues (1937) were the first to report the medial-to-lateral leg-to-face somatotopic "homunculus" in the human primary motor cortex; a representation that has been confirmed with neuroimaging for large body parts (Meier 2008; Schieber 2002; Chainay 2004). However, two fundamental deviations from this simple linear arrangement of body parts have been reported. First, individual neurons in the primary motor cortex are not tuned to individual body parts but show gradual overlap of multiple body parts (Schieber 1993, 2002; Indovina 2001). Second, the progression of body parts from face representations towards leg representation does not follow a simple steady linear order. In monkeys, multiple unconnected body part representations were reported (Kwan 1978; Park 2001; Sanes 1995). As such, it was suggested that the hand is emphasized in a core region, and the wrist, arm, and shoulder are emphasized in a half ring surrounding the core (Strohter 2012; Strick and Preston 1982; Porter and Lemon 1993; Meier and Alfalo, 2008). However, the organizational principle of smaller body parts such as individual digits could not be resolved due to the lack of localization specificity of conventional GE-BOLD fMRI and the sparse sampling of invasive electrophysiological recordings.

In light of these deviations from a linear somatotopic organization, alternative organizational principles for the motor cortex have been investigated. Previous findings show that when a small part in the monkey motor cortex is electrically stimulated, the resulting movement combines joints and muscles in a manner resembling a coordinated action (Graziano et al. 2002), suggesting that the motor cortex organization might follow an action map representation rather than a body part map (Graziano 2016; Sanes 1995). It is not clear, however, how the action-map representation on the microscale is integrated into the body map representation on the macro-

scopic scale. Due to recent methodological advances in fMRI (Polimeni 2010; De Martino 2015; Huber 2017) the mesoscopic regime of sub-millimeter resolutions becomes accessible for non-invasive functional neuroimaging across intracortical structures across columnar and laminar directions in humans. Thus, mesoscopic fMRI could provide insights how (microscopic) action maps are integrated into (macroscopic) somatotopic body part maps.

The cortical layer dependence of topographical organization in the primary motor cortex is not well understood. In primary visual cortex and primary auditory cortex, recent advancements in high-resolution fMRI have revealed that topographical representations vary in width across cortical layers. By means of Gaussian population receptive field (pRF) models, it was found that topographical representations can be sharper in superficial layers compared to middle and deeper layers (De Martino 2015; Klein 2018; Fracasso 2016). Potentially, the discrepancy between action-map representations on the microscale and body map representation on the macroscale can be accounted for by different organizational schemes across cortical depths, a dimension that previous neuroimaging studies were unable to explore.

This study employed recent and advanced methods of high-resolution imaging and novel analysis methodology to investigate topographical organization patterns across the ‘columnar’ and ‘laminar’<sup>1</sup> cortical dimensions. We investigated the meso-scale (sub-millimeter) topographical representations of the primary motor (M1) and primary sensory cortex (S1). We employed a new non-invasive cerebral blood volume (CBV)-sensitive fMRI method to achieve sub-millimeter localization specificity with a large volume coverage of the entire central sulcus. This is achieved with conventional 7T MRI hardware and a non-invasive VASO (vascular space occupancy) sequence (Lu 2003; Hua 2013; Huber 2015). We use this method to investigate the organizational principle of individual finger representations for a set of simple motor actions including tapping, grasping (flexion) and retraction movements (extension). We find mesoscopic topographic finger representations in M1 on the order of  $1.2 \pm 0.4$  mm. We find evidence of a simple topographical organizational principle: Fingers are represented in multiple somatotopically organized patches that are preferentially activated for either grasping or retraction movement actions.

## Results

To investigate the columnar organization of the primary motor cortex with fMRI, five different experiments (Fig. S1) were conducted. These were:

- A Individual tapping of two fingers (index and little).
- B Individual tapping of four fingers (index, middle, ring, and little; no thumb) interspaced with rest periods.

<sup>1</sup>Note, that in the context of fMRI, ‘columnar’ and ‘laminar’ do not refer to cytoarchitecturally and myelo-architecturally defined layers and receptive field defined columns (see discussion in the supplementary information 6). Instead they refer to mesoscopic structures that are aligned along (tangential) and perpendicular (radial) to the cortical depths. Also known as “cortical depths” and “hypercolumns”.

- C Individual tapping of all five fingers (index, middle, ring, little, and thumb) interspaced with rest periods.
- D Alternating grasping or retraction of a rubber ball interspaced with rest periods. These tasks engage muscle extension and muscle flexion of every finger.
- E Resting-state.

Motor tasks were performed with the left hand, while imaging the primary sensorimotor cortex at both sides of the central sulcus in the right hemisphere (Fig. 1A). The right hand was not engaged during any experiments of this study. For more background on these tasks and explanations, why this task setup was used, see the supplementary information (Fig. S1). Five participants underwent 42 fMRI sessions of 2 hours each (84h of scanning, Tab S1). We simultaneously measured changes in the cerebral blood volume (CBV) and blood oxygenation level dependent (BOLD) response using the SS-SI-VASO method (Huber 2014; Lu 2003) with a 3D-EPI readout (Poser 2010) at 7T. The nominal resolution was 0.89 mm in the columnar dimension and 0.99 mm thick slices perpendicular to the precentral bank of the central sulcus – also known as the hand knob (Fig. 1A). Estimates of cortical depths (layers) and cortical distances (columns) across the entire central sulcus were calculated by means of simultaneously acquired anatomical and functional image contrasts in EPI space (Fig. 1B, 1G). Details on the data acquisition and analysis approach are provided in the Supplemental Experimental Procedures (Fig. S1-S11). Brain activity changes are estimated as the percent signal change of the fMRI signal during the task, compared to rest. Relative digit dominances are estimated as the activity change for a given finger compared to the activity change for all other fingers.

Functional MRI signal changes in S1 show a linear arrangement of individual digits (Fig. 1) as previously described in high-resolution fMRI (Olman 2012; Panchuelo 2016; Kolasinsky 2016; Schluppeck 2017; Siero 2014; Ejaz 2015). The distance between the representations of the thumb and the little finger in S1 is  $16 \pm 4$  mm. In M1 we find clear deviations from a continuous linear alignment of the digit representations; we find multiple representations of every digit in a mirrored pattern (Fig. 2). These digit representations are significantly smaller than the representations in the sensory cortex. The distance between the representations of the thumb and the little finger in M1 is  $6 \pm 2$  mm. The mirrored pattern of multiple distant digit representations was highly consistent across participants (Fig. 2), across fMRI contrasts (Fig. S5), across tasks (S9), and across days (Fig. S6).

We find that different patches of the hand knob in M1 are preferentially activated during grasping and retraction movements, respectively. These patches are  $6 \pm 2$  mm in size and columnar distance. We find that the outlines of grasping and retraction preference patches contain complete sets of all digit preferences (copper and turquoise outlines in Fig. 2B).

We next quantified relative preferences for body parts (i.e., different fingers) and movements (i.e., grasping versus retraction) along the medial-lateral axis in both the primary motor

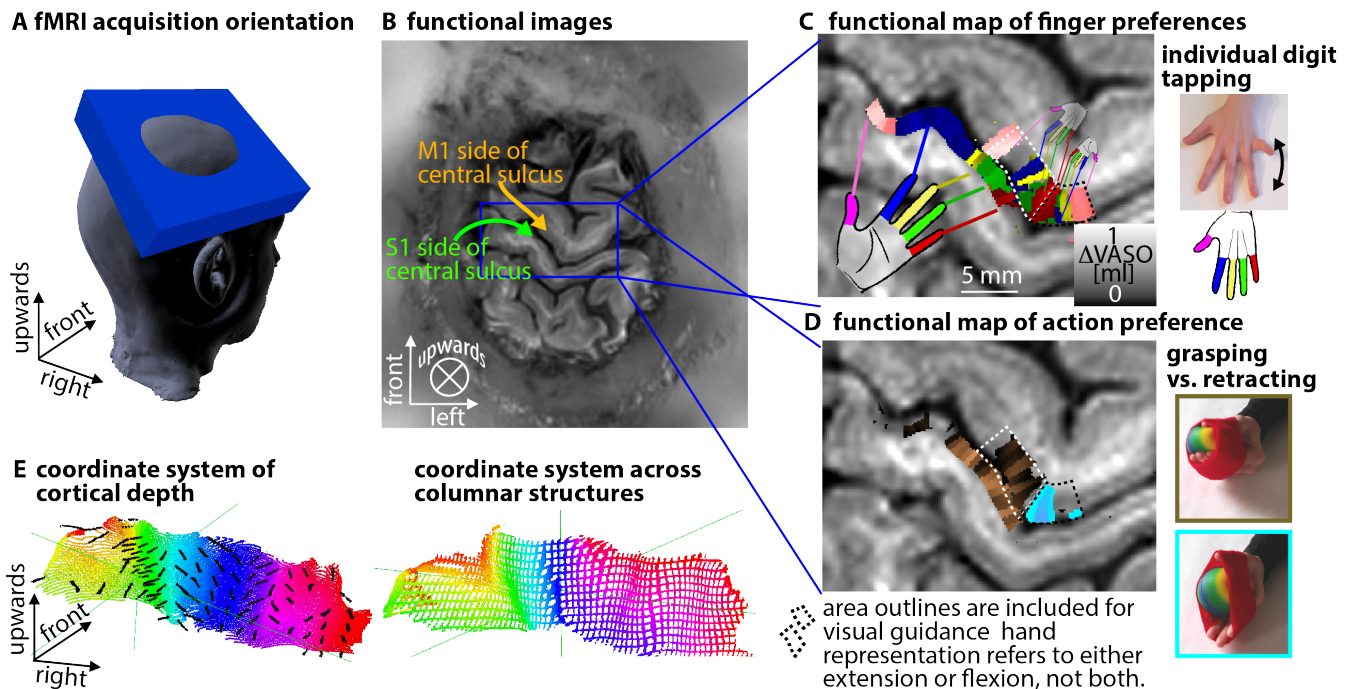

**Figure 1.** Acquisition and analysis methods for measuring the laminar and columnar functional topography. A-B) The imaging slab is aligned to cover the entire primary sensorimotor cortex and slices are tilted as indicated by the blue box through the right cortical hemisphere. C) The functional CBV signal changes obtained using a five-finger tapping task reveal individual digit representations in M1 and S1. While S1 has a homunculus like linear representation of individual digits, the primary motor cortex shows clear deviations of the homunculus model. D) While S1 has a stronger activity for grasping compared to retraction motor actions, the primary motor cortex shows individual patches of areas that are either specific to grasping or retraction actions. E) Coordinate systems for cortical depth and columnar analysis. The functional signal changes are analyzed in an orthogonal coordinate system that lies within the participant-specific anatomy in EPI-space. For further graphical guidance about the respective dimensions and coordinate systems, see Fig. S3. All functional results shown here refer to left hand movement tasks. The right hand was not engaged here.

and primary sensory cortex. Columnar profiles along the central sulcus are shown in Fig. 3, for one representative participant. In the primary motor cortex, we find a sharp switch in preference between grasping and retraction at a certain point along this axis (Fig. 3A left, echoing results shown in the last row of Fig. 2). In the primary sensory cortex, we find a strong preference to grasping tasks only. There are no clear areas that have a stronger S1 response to retraction versus grasping (Fig. 3A, right). This is likely because common grasping actions are more often associated with stimulations of the sensory receptors (exteroception on the fingertips and inside of the hand) compared to retraction actions. Representations of sensory proprioception in the primary sensory cortex might be similarly engaged for grasping and retraction movements and, thus, do not introduce a preference to either of the two motor actions in the sensory cortex. The columnar profiles in Fig. 3B also clearly demonstrate the multiple mirrored finger representations in M1, versus the single linear representation in S1. Finally, we quantified relative finger preferences across both columnar and layer dimensions (Fig. 3C). We find that there is a more gradual transition between preferred fingers (i.e., more overlap across finger representations) in superficial layers (solid lines) than in deeper layers (dashed lines), where the transition is sharper. This result is also confirmed in resting-state data (Fig. S8).

Besides task-based topographical descriptions, we also characterized the topography of finger representations in resting-state functional connectivity with the sensory cortex. The aim of these investigations was to confirm the multiple digit rep-

resentations in the motor cortex on data that does not rely on a specific task design. As expected from the task-based data, we find the same multi-stripe patterns in the primary motor cortex for A) task-induced motor activity, B) resting-state seed-based correlation, and C) selected independent components of FSL-melodic ICA (Fig. 4). In all three cases, the two investigated fingers (index and little) are represented as two clear patches in the sensory cortex (red and blue arrows in bottom left of Fig. 4A-C). In the motor cortex, however, multiple red and blue patches can be identified. The resulting stripe-pattern of blue-red-blue is very similar for task and resting-state results (red and blue arrows in top right of Fig. 4A-C). We find that the digit representations in the sensory cortex have a stronger connectivity with the grasping patches in the motor cortex compared to its retraction patches (Fig. 4E-D). This is consistent with the task results showing that the sensory cortex has stronger activity for grasping motor actions compared to retraction motor actions.

## Discussion

The data presented here suggest a simple mesoscopic topographical organization principle of individual fingers in the primary motor cortex at an unprecedented spatial resolution. The primary motor cortex has been extensively studied in cytoarchitecture, functional representations using invasive electrophysiology, human non-invasive electrophysiology and neuroimaging. No comprehensive view, however, has emerged regarding how the representations of actions,

A) digit representation in S1 and M1 across 4 people

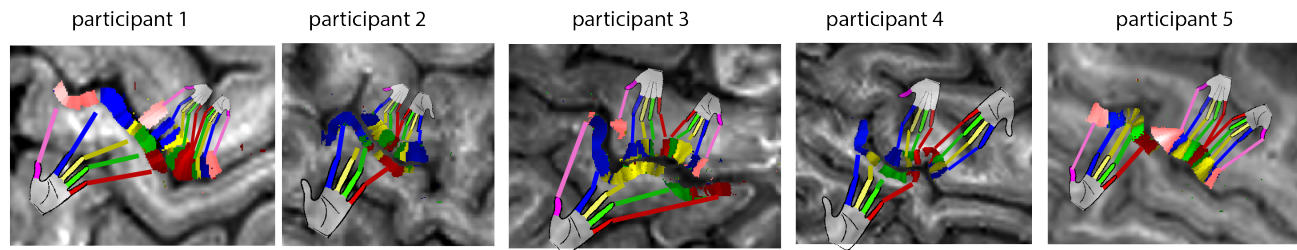

B) digit representations in M1 match with local patterns of action representations

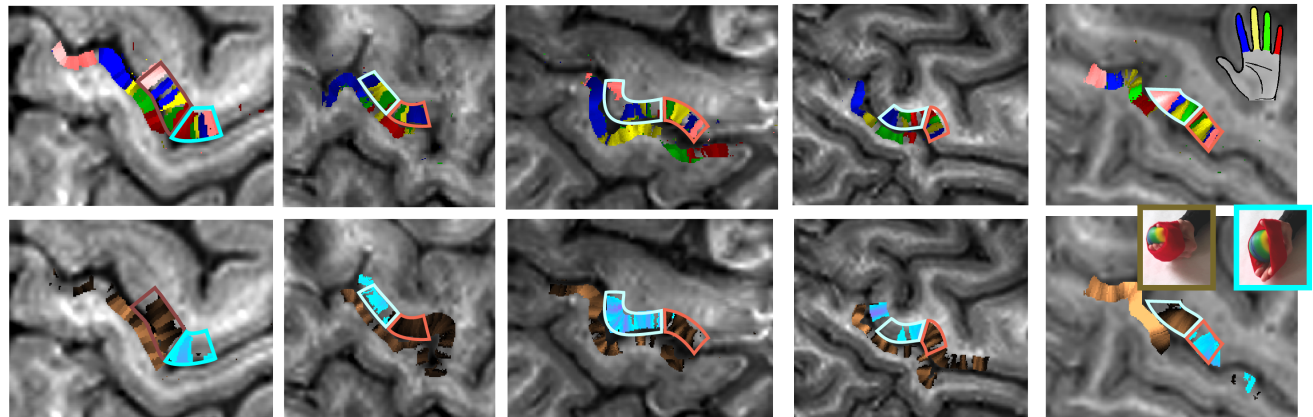

**Figure 2.** Multiple hand representations across participants. A) The finger dominance maps show across all participants that the primary sensory cortex has a single representation of each finger in all participants, while the primary motor cortex has multiple finger representations of each finger. The representations in the primary motor cortex are mirrored and about half the size of the representations in the primary somatosensory cortex. B) The spatial pattern of multiple finger representations is compared to the representations of different action movements, grasping and retraction of a ball. Each complete set of fingers is outlined with manually drawn borders. These borders match the outlines of the different action tasks. The copper and turquoise colors refer to preferred grasping and retraction preference, respectively. The functional contrast refers to relative action preference between task conditions. I.e., turquoise patches refer to stronger activity during retraction periods compared to grasping periods (see also Fig. S7 for absolute signal changes). The maps in the left column are the same as in Fig. 1. All functional results shown here refer to left hand movement tasks. The right hand was not engaged.

as found with electrical microstimulation (Strick and Preston 1928, Graziano 2002, 2016) translate into somatotopic organization principles, as detected for larger body parts. Here, using high-resolution CBV-fMRI neuroimaging in humans and topographical analysis tools, we reveal how these different organizational principles are integrated across cortical columns and layers.

We find evidence for action specific representations of fingers in M1, as well as for finger specific representations. Our results reveal how these multiple organizational principles are elegantly combined in M1: We find multiple mirrored representations of individual fingers that are differently engaged for specific movement actions (Fig. 1, 2, 3). Thus, M1 is organized as an action map as well as a topographical finger map in small (0.9-1.2 mm) representations along the columnar dimension within 4-9 mm action patches.

The multiple representations of individual fingers can be seen in both task-based fMRI and resting-state functional connectivity with S1 (Fig. 3). We find that the finger representations in the motor cortex are very similar across cortical depths. There are only small differences between superficial cortico-cortical input layers II/III and corticospinal output layers Vb/VI. Namely, the size of the finger representations is slightly smaller in deeper layers compared to superficial layers. One potential origin of the sharper body part

representation in deeper layers might be associated with previously described phenomena of surround inhibition in M1. This kind of surround inhibition in M1 has been proposed to serve the function of improved discriminability between motor representations. The phenomenon has been described as the reduction of corticospinal excitability in muscles that are non-active but adjacent to the active muscles (Beck and Hallett, 2011). During voluntary finger flexion, the person's muscle shows increased corticospinal excitability, whereas the surrounding neighboring muscle shows decreased corticospinal excitability. However, due to the lack of invasive layer-dependent electrophysiology measurements in the literature about M1, it is unclear whether this is expected to be different across cortical layers, as it is in sensory brain areas (Hubel and Wiesel, 1968, 1972). In resting-state fMRI, we find that the functional connectivity strength varies, as it also does with task-based fMRI, with more tightly constrained connectivity in deeper layers compared to superficial layers (see Fig. S8).

It is important to note that the motor cortex representations of grasping vs. retraction are not completely orthogonal to each other: that is, the entire hand knob shows increased activity to both grasping as well as extension movements, compared to rest. The respective grasping and retraction patches show differential sensitivity to either motor action (Fig. S9) only.

### A) grasping vs retracting dominance distributions across columnar distances

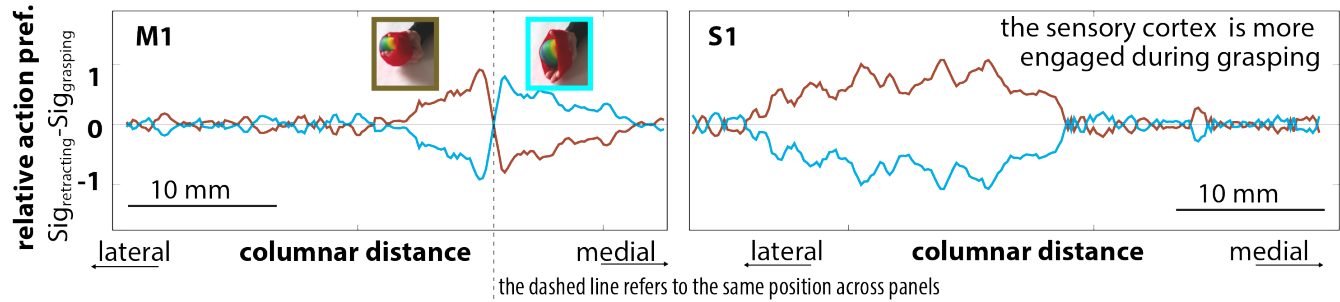

the dashed line refers to the same position across panels

### B) finger dominance distributions across columnar distances

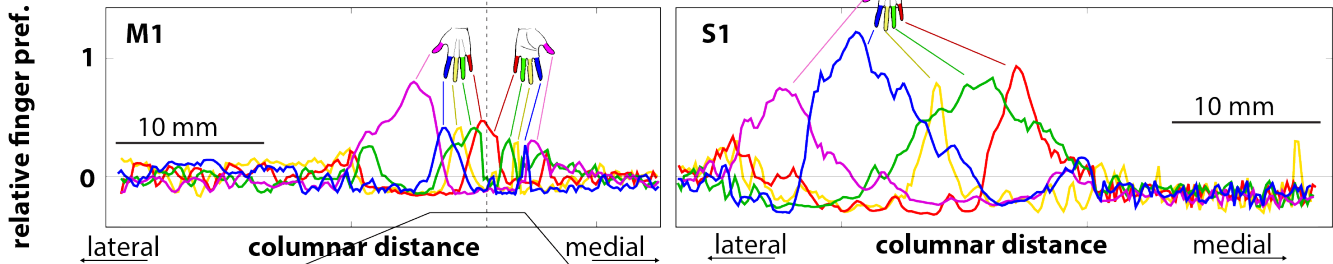

### C) zoomed section of two finger representations across cortical depths

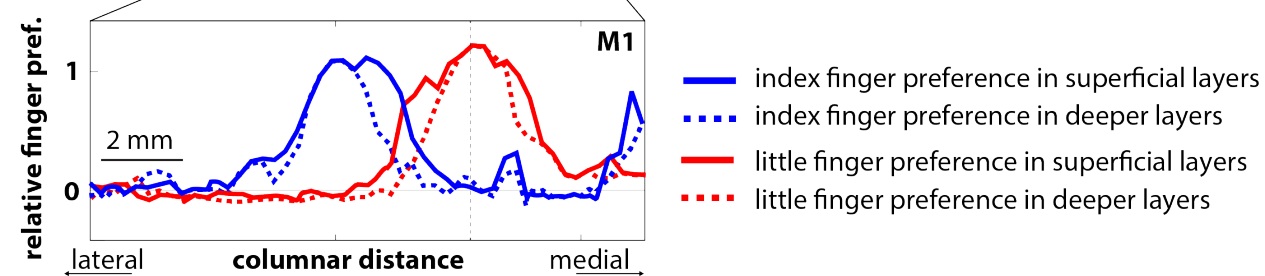

**Figure 3.** Columnar profiles of functional representations along the central sulcus of participant 1. Panel A) depicts the columnar distribution of grasping preference and retraction preference. While the entire primary sensory cortex is more engaged for grasping actions, the primary motor cortex has distinct patches that are preferentially more active for either grasping or retraction. Panel B) shows that each of the patches in the primary motor cortex contains a complete set of linearly aligned finger patches. Panel C) shows that superficial cortical layers have larger overlap across fingers compared to deeper layers. The dashed line in panel A-C refers to the same columnar position. The unit of the y-axis refers to the relative signal change between conditions (see Fig. S5). The results refer to a projection of a 0.79 mm slab through the central sulcus. The scale bars refer to the spatial distance along the curved GM accounting for the average curvature in the projection slab. The anatomical contrast along these columnar profiles is given in Fig. S7 for reference.

Other potential movements could theoretically engage the two patches even more differentially: for example, spreading fingers vs. clenching fist; maintaining force without movement (i.e., isometric muscle contraction) vs. movement with minimal force, and others. These potential movement actions are only partly segregated for the particular flexion vs. extension task used here. For the finger tapping tasks used here, the individual finger movements underwent both extension and flexion movements. Thus, the double-hand map can relate to grasping and retraction task that engages flexion and extension differently.

In the primary somatosensory cortex, we find no clear deviations from the homunculus model as shown previously in humans (Ejaz 2015; Schluppeck 2017; Olman 2012; Kolasinski 2016; Shellekens 2018).

Previous digit mapping studies using GE-BOLD fMRI could not clearly identify the mirrored finger representation in the primary motor cortex. This might be due to the fact that GE-BOLD fMRI suffers from poor localization specificity due to

of large draining veins (Turner 2002; Menon 2002; Kim and Ogawa, 2012; Kennerley 2015). Most human fMRI studies that investigated somatotopic organization likely did not have the sub-millimeter specificity to investigate deviations from the linear representation without methodological challenges (Olman 2012; Siero 2014; Dechent and Frahm 2003, Hlustik 2001; Shellekens 2018). We believe the columnar specificity of GE-BOLD could be limited by two potential sources of venous contaminations. First, large principal veins are described to have tangential branch lengths of 2-6 mm (Fig. 8E) (Duvernoy 1981). Thus, these tangential veins can result in more tangential signal mixing of GE-BOLD signal compared to their respective neural representations. Second, in some participants the sensory and motor banks of the central sulcus can be drained by the same pial veins. BOLD signal changes in the precentral gyrus can thus be contaminated by signal leakage from the postcentral gyrus. Other methodological challenges to identify the double-hand signature may arise from sensitivity limitations, task design, anal-

### A) two-finger tapping task

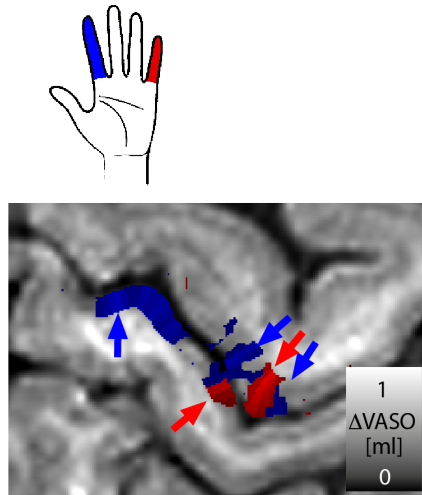

### B) seed-based resting-state functional connectivity

seed ROIs are in sensory cortex

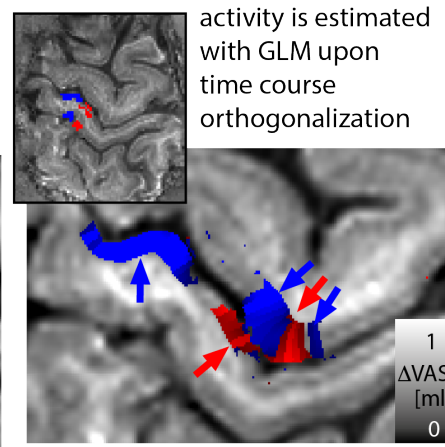

### C) selected components from FSL-Melodic (ICA)

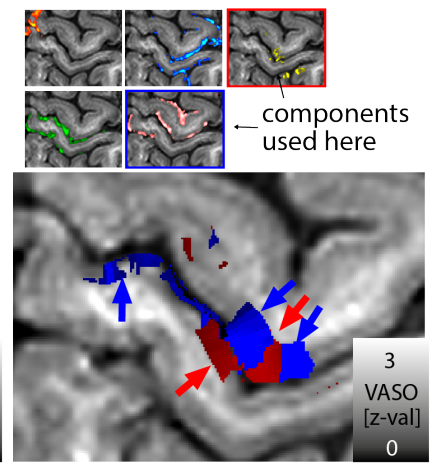

↑ ↗ arrows are included for visual guidance to show that the blue-red-blue patterns are the same for task-based and resting-state fMRI

### E) functional connectivity between M1 and S1

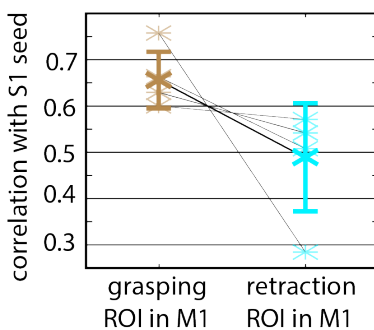

### D) similarity of fluctuations in representation of grasping and retraction

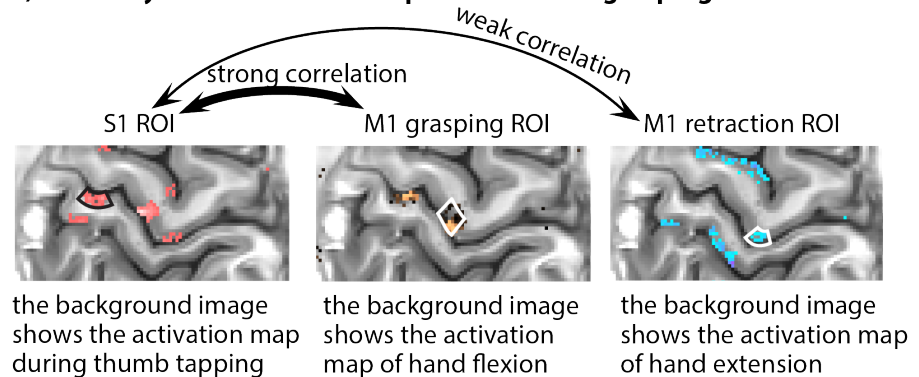

**Figure 4.** Patterns of similar temporal fluctuations in resting-state activity match the patterns of task-evoked activity. A) Map of voxelwise preferences to become active during index finger movement or little finger movement. As shown in Fig. 1-2, the primary motor cortex has multiple representations of individual fingers. B) Map of resting-state signal fluctuation similarity for seed regions in the primary sensory cortex (inset). The colors refer to seed regions of interest (ROIs) that represent the little finger and index finger in S1. C) Very similar networks are generated using selected components from an ICA decomposition as seeds for connectivity analysis. Here we selected two (the ones outlined in blue and red) and used those as "seeds" to compute a preferential correlation map. D) The functional resting-state connectivity between individual finger representation areas in M1 and S1 are stronger for regions that represent grasping actions than for regions that represent retracting actions. E) Seed-based correlation analysis between the thumb representation in S1 and two thumb representations in M1 reveal that the flexion representation has larger functional connectivity to S1 than the extension representation. This might be associated with the fact that common grasping actions are more often associated with stimulations of the sensory receptors (on the inside of the hand) than retraction actions. The star symbols refer to individual participant and the error bars refer to the inter-participant standard deviation.

ysis design and effective resolution. Our results show that CBV-based fMRI has a higher localization specificity than conventional GE-BOLD fMRI (Fig. S2,S5,S9), thus overcoming the specificity limitations of previous studies. Even though CBV-based fMRI has a lower sensitivity and requires longer scan durations to exceed the detection threshold, it provides clearer results. The higher localization specificity of CBV-fMRI has previously been shown in humans with VASO fMRI (Huber 2017) across cortical layers. In this study we extend this finding and also show the higher localization specificity of VASO across cortical columns.

To optimally separate individual digit representations, we included long rest periods into the experiment and used a pseudo random ordering of individual fingers. This is different to previously employed "phase-encoding" paradigms

and it comes at the cost of less efficient task design requiring longer scan durations. However, it can be more sensitive to detect deviations of continuously linearly aligned representations.

Previous studies by Sane et al. (1995) and by Ejaz et al. (2015) already identified deviations from linear organizations for finger representations in the human motor cortex with GE-BOLD at 2.5 mm and 1.4 mm resolutions, respectively. However, without the localization specificity, a consistent spatial layout principle, such as the mirrored finger representation alignment, was not found. Instead, the exact pattern of overlapping and segregated representations was interpreted as noise due to inter-individual variability in every day hand movements (Ejaz 2015).

Previous studies with PET had shown multiple hand move-

ment representations across both sub-areas of the primary motor cortex (Geyer 1996), BA4a and BA4p, respectively. The mirrored double-hand representation shown here (Fig. 2-3) is located in the anterior side (BA4a) of the primary motor cortex, only. Thus, the hand representations in BA4p, as discussed in (Geyer 1996) refers to yet another representation of the fingers. We find that this finger representation in BA4p is actually not completely separated from the one in BA4a. It is partly connected to the representation in BA4a and does not show a mirrored pattern (Fig. S10).

In contrast to human fMRI literature, electrophysiological recordings have shown deviations from a linear somatotopic organization. However, much of our understanding from the electrophysiological organization in M1 comes from experiments in which stimulations or recordings are performed from few cortical points only, whereas neuroimaging samples continuous and uniformly across space. Thus, continuously sampled maps of the motor cortex representations with electrophysiology at the sub-millimeter resolution have not been collected yet across columns and layers. And consequently, most of these studies only conclude that the representation pattern is complicated and nonlinearly organized (Schieber 1993; Hatsopoulos 2010) without proposing an alternative organization principle.

In this study we show for the first time that individual fingers have multiple representations in a mirrored pattern along the lateral-medial axis of primary motor cortex, with each whole-hand instance corresponding to a distinct movements. This mirrored representation across grasping and retraction patches gives rise to neighboring representations for movement synergies (d'Avella and Bizzi 2005). As already suggested by Penfield (1937), our data show that the Penfield homunculus model is an oversimplification. With high resolution fMRI, we can confirm deviations of the homunculus model in M1 at very high resolutions corresponding to small body parts. Our data agree with the hypothesis that at the sub-millimeter regime, the motor cortex is organized as an action map (Graziano 2016).

The present data corroborate several findings from invasive electrophysiological recordings and microstimulation experiments in rodents and monkeys, that have elucidated the organizational principle of M1, and extend those to the level of the human M1. The presented methodology allows non-invasive recording of mesoscale functional representations in human M1 that were previously inaccessible. This might help to further understand the blueprint of cortical control over movement dynamics and kinematics. Beyond that, functional imaging of M1 at the layer and columnar level may help to elucidate how aberrations in the organizational principle could lead to movement disorders like dystonia, of which the pathophysiology is largely unknown.

## Summary

Here we used advanced non-invasive neuroimaging in humans to provide novel insights in the organisational principle of the primary motor and sensory cortex at the mesoscale. We demonstrate for the first time that individual fingers are

represented multiple times in the primary motor cortex in a columnar fashion following mirrored pattern, and these representations are differentially engaged during specific motor actions (i.e., grasping versus retraction movements). By using new imaging and analysis technology that bridge the gap between invasive electrophysiological recordings and non-invasive large coverage mesoscopic fMRI in humans, we resolve previous controversies of M1 representation principles as 'body map' at the macro-scale vs. 'action maps' at the micro-scale.

## Acknowledgements

The research was supported by the NIMH Intramural Research Program (ZIA-MH002783). We thank Kenny Chung and Harry Hall for radiographic assistance. The study was approved under NIH Combined Neuroscience Institutional Review Board protocol 93-M-0170 (ClinicalTrials.gov identifier: NCT00001360). Portions of this study used the high-performance computational capabilities of the Biowulf Linux cluster at the National Institutes of Health, Bethesda, MD (biowulf.nih.gov). We thank Hartwig Siebner and Mark Hallett for comments on the manuscript. We thank James Kolaskinsky for discussions about intermediate results of this study and task design. This preprint is formatted based on a  $\LaTeX$ class by Ricardo Henriques.

## Author contributions

L.H., conducted the experiments. L.H., P.B. designed the tasks. L.H., E.F. designed the analysis. L.H., S.K., D.G. wrote the analysis code. B.P., L.H., D.I. designed the MR-sequence, D.H., M.B., N.P., S.M., J.G. provided advice on experimental design, sequence, analysis, and research direction. L.H. wrote the draft of the manuscript. All authors contributed to the study story line and edited the manuscript.

## Data and Software availability

All raw, anonymized MRI data of this study can be anonymously downloaded here. Fully processed data of two participants can be downloaded here. All custom written software (source code) and evaluation scripts are available on Github. The authors are happy to share the 3D-VASO MR sequence upon request via a SIEMENS C2P agreement. A complete list of scan parameters used in this study is available on GitHub.

## Bibliography

Beck, S., and Hallett, M. (2011). Surround inhibition in the motor system. *Exp. Brain Res.* 210, 165–172.

Chainay, H., Krainik, A., Tanguy, M., Gerardin, E., and Bihan, D. Le (2004). Foot, face and hand representation in the human supplementary motor area. *Neuroreport* 15, 1–5.

d'Avella, A., and Bizzi, E. (2005). Shared and specific muscle synergies in natural motor behaviors. *Proc. Natl. Acad. Sci.* 102, 3076–3081.

- Dechent, P., and Frahm, J. (2003). Functional somatotopy of finger representations in human primary motor cortex. *Hum. Brain Mapp.* 18, 272–283.
- De Martino, F., Moerel, M., Ugurbil, K., Goebel, R., Yacoub, E., and Formisano, E. (2015). Frequency preference and attention effects across cortical depths in the human primary auditory cortex. *Proc. Natl. Acad. Sci.* 112, 16036–16041.
- Ding, S.L., Royall, J.J., Sunkin, S.M., Ng, L., Facer, B.A.C., Lesnar, P., Guillozet-Bongaarts, A., McMurray, B., Szafer, A., Dolbeare, T.A., et al. (2016). Comprehensive cellular-resolution atlas of the adult human brain. *J. Comp. Neurol.* 524, 3127–3481.
- Duvernoy, H.M., Delon, S., and Vannson, J.L. (1981). Cortical blood vessels of the human brain. *Brain Res.* 7, 519–579.
- Ejaz, N., Hamada, M., and Diedrichsen, J. (2015). Hand use predicts the structure of representations in sensorimotor cortex. *Nat. Neurosci.* 103, 1–10.
- Fischl, B., and Dale, A.M. (2000). Measuring the thickness of the human cerebral cortex from magnetic resonance images. *Proc. Natl. Acad. Sci.* 97, 11050–11055.
- Fracasso, A., Petridou, N., and Dumoulin, S.O. (2016). Systematic variation of population receptive field properties across cortical depth in human visual cortex. *Neuroimage* 139, 427–438.
- Geyer, S., Ledberg, A., Schleicher, A., Kinomura, S., Schormann, T., Burgel, U., Klingberg, T., Larsson, J., Zilles, K., and Roland, P.E. (1996). Two different areas within the primary motor cortex of man. *Nature* 382, 805–807.
- Graziano, M.S.A., Taylor, C.S.R., and Moore, T. (2002). Complex movements evoked by microstimulation of precentral cortex. *Neuron* 34, 841–851.
- Graziano, M.S.A. (2016). Ethological Action Maps: A Paradigm Shift for the Motor Cortex. *Cel* 20, 121–132.
- Hatsopoulos, N.G. (2010). Columnar organization in the motor cortex. *Cortex* 46, 270–271.
- Hlustík, P., Solodkin, A., Gullapalli, R.P., Noll, D.C., and Small, S.L. (2001). Somatotopy in human primary motor and somatosensory hand representation revisited. *Cereb. Cortex* 11, 312–321.
- Hua, J., Jones, C.K., Qin, Q., and van Zijl, P.C.M. (2013). Implementation of vascular-space-occupancy MRI at 7T. *Magn. Reson. Med.* 69, 1003–1013.
- Hubel, D.H., Wiesel, T.N., (1968). Receptive fields and functional architecture of monkey striate cortex. *J. Physiol.* 195, 215–243.
- Hubel, D.H., Wiesel, T.N., 1972. Laminar and columnar distribution of geniculo-cortical fibers in the macaque monkey. *J. Comp. Neurol.* 146, 421–450.
- Huber, L., Ivanov, D., Krieger, S.N.S.N., Streicher, M.N.M.N., Mildner, T., Poser, B.A.B.A., Möller, H.E., Turner, R., Moller, H.E., and Turner, R. (2014). Slab-selective, BOLD-corrected VASO at 7 tesla provides measures of cerebral blood volume reactivity with high signal-to-noise ratio. *Magn. Reson. Med.* 72, 137–148.
- Huber, L., Handwerker, D.A., Jangraw, D.C., Chen, G., Hall, A., Stüber, C., Gonzalez-Castillo, J., Ivanov, D., Marrett, S., Guidi, M., et al. (2017). High-resolution CBV-fMRI allows mapping of laminar activity and connectivity of cortical input and output in human M1. *Neuron* 96, 1253–1263.
- Huber, L., Tse, D.H.Y., Wiggins, C.J., Jangraw, D.C., Bandettini, P.A., Poser, B.A., and Ivanov, D. (2018). Ultra-high resolution blood volume fMRI and BOLD fMRI in humans at 9.4T: Capabilities and challenges. *Neuroimage* ahead of print.
- Hurley, A.C., Al-Radaideh, A., Bai, L., Aickelin, U., Coxon, R., Glover, P., and Gowland, P.A. (2010). Tailored RF pulse for magnetization inversion at ultrahigh field. *Magn. Reson. Med.* 63, 51–58.
- Indovina, I., and Sanes, J.N. (2001). On somatotopic representation centers for finger movements in human primary motor cortex and supplementary motor area. *Neuroimage* 13, 1027–1034.
- Ivanov, D., Barth, M., Uludag, K., and Poser, B.A. (2015). Robust ACS acquisition for 3D echo planar imaging. In *Proceedings of the International Society of Magnetic Resonance in Medicine*, p. 2059.
- Kennerley, A.J., Berwick, J., Martindale, J., Johnston, D., Papadakis, N.G., and Mayhew, J.E. (2005). Concurrent fMRI and optical measures for the investigation of the hemodynamic response function. *Magn. Reson. Med.* 54, 354–365.
- Kim, S.-G., and Ogawa, S. (2012). Biophysical and physiological origins of blood oxygenation level-dependent fMRI signals. *J. Cereb. Blood Flow Metab.* 32, 1188–1206.
- Klein, B.P., Fracasso, A., van Dijk, J.A., Paffen, C.L.E., te Pas, S.F., and Dumoulin, S.O. (2018). Cortical depth dependent population receptive field attraction by spatial attention in human V1. *Neuroimage* 176, 301–312.
- Kolasinski, J., Makin, T.R., Jbabdi, S., Clare, S., Stagg, C.J., and Johansen-Berg, H. (2016). Investigating the Stability of Fine-Grain Digit Somatotopy in Individual Human Participants. *J. Neurosci.* 36, 1113–1127.



- Kuehn, E., Dinse, J., Jakobsen, E., Long, X., Schäfer, A., Bazin, P.-L., Villringer, A., Sereno, M.I., and Margulies, D.S. (2017). Body Topography Parcellates Human Sensory and Motor Cortex. *Cereb. Cortex* 27, 3790–3805.
- Kwan, H.C., MacKay, W.A., Murphy, J.T., and Wong, Y.C. (1978). Spatial organization of precentral cortex in awake primates. II. Motor outputs. *J. Neurophysiol.* 41, 1120–1131.
- Lu, H., Golay, X., Pekar, J.J., and van Zijl, P.C.M. (2003). Functional magnetic resonance imaging based on changes in vascular space occupancy. *Magn. Reson. Med.* 50, 263–274.
- Marques, J.P., Kober, T., Krueger, G., van der Zwaag, W., Van de Moortele, P.-F., and Gruetter, R. (2010). MP2RAGE, a self bias-field corrected sequence for improved segmentation and T1-mapping at high field. *Neuroimage* 49, 1271–1281.
- Meier, J., and Aflalo, T. (2008). Complex organization of human primary motor cortex: a high-resolution fMRI study. *J Neurophysiol* 100, 1800–1812.
- Menon, R.S. (2002). Postacquisition suppression of large-vessel BOLD signals in high-resolution fMRI. *Magn. Reson. Med.* 47, 1–9.
- Sanes, J.N., Donoghue, J.P., Thangaraj, V., Edelman, R.R., and Warach, S. (1995). Shared neural substrates controlling hand movements in human motor cortex. *Science* 268, 1775–1777.
- Schellekens, W., Petridou, N., and Ramsey, N.F. (2018). Detailed somatotopy in primary motor and somatosensory cortex revealed by Gaussian population receptive fields. *Neuroimage, Press.* 179, 337–347.
- Schellekens, W., Petridou, N., and Ramsey, N.F. (2017). Mapping the human homunculus with receptive field analysis. In *Society for Neuroscience*, p. 62.13.
- Schieber, M.H., and Hibbard, L.S. (1993). How somatotopic is the motor cortex hand area? *Science* (80). 261, 489–492.
- Schieber, M.H. (2002). Motor cortex and the distributed anatomy of finger movements. *Adv. Exp. Med. Biol.* 508, 411–416.
- Schluppeck, D., Sanchez-Panchuelo, R.M., and Francis, S.T. (2017). Exploring structure and function of sensory cortex with 7 T MRI. *Neuroimage* ahead of print.
- Siero, J.C.W., Hermes, D., Hoogduin, H., Luijten, P.R., Ramsey, N.F., and Petridou, N. (2014). BOLD matches neuronal activity at the mm scale: A combined 7T fMRI and ECoG study in human sensorimotor cortex. *Neuroimage* 101, 177–184.
- Strick, P.L., and Preston, J.B. (1982). Two representations of the hand in area 4 of a primate. I. Motor output organization. *J.Neurophysiol.* 48, 139–149.
- Strother, L., Medendorp, W.P., Coros, A.M., and Vilis, T. (2012). Double representation of the wrist and elbow in human motor cortex. *Eur. J. Neurosci.* 36, 3291–3298.
- Olman, C., Pickett, K. a, Schallmo, M.P., and Kimberley, T.J. (2012). Selective BOLD responses to individual finger movement measured with fMRI at 3T. *Hum. Brain Mapp.* 33, 1594–1606.
- Sanchez Panchuelo, R.M., Ackerley, R., Glover, P.M., Bowtell, R.W., Wessberg, J., Francis, S.T., and McGlone, F. (2016). Mapping quantal touch using 7 tesla functional magnetic resonance imaging and single-unit intraneural microstimulation. *Elife* 5, e12812.
- Park, M.C., Belhaj-Saïf, A., Gordon, M., and Cheney, P.D. (2001). Consistent features in the forelimb representation of primary motor cortex in rhesus macaques. *J. Neurosci.* 21, 2784–2792.
- Penfield, W., and Boldrey, E. (1937). Somatic Motor and Sensory Representation in Man. *Brain* 389–443.
- Porter, R., and Lemon, R. (2012). *Corticospinal function and voluntary movement* (Oxford University Press).
- Poser, B.A., Koopmans, P.J., Witzel, T., Wald, L.L., and Barth, M. (2010). Three dimensional echo-planar imaging at 7 tesla. *Neuroimage* 51, 261–266.
- Turner, R. (2002). How much cortex can a vein drain? Downstream dilution of activation-related cerebral blood oxygenation changes. *Neuroimage* 16, 1062–1067.
- Thakur, P.H., Bastian, A.J., and Hsiao, S.S. (2008). Multidigit Movement Synergies of the Human Hand in an Unconstrained Haptic Exploration Task. *J. Neurosci.* 28, 1271–1281.
- Wagstyl, K., Lepage, C., Bludau, S., Zilles, K., Fletcher, P.C., Amunts, K., and Evans, A.C. (2018). Mapping Cortical Laminar Structure in the 3D Big-Brain. *Cereb. Cortex* 1–12

## Supplementary methods

### Sample size

Five healthy right-handed volunteers (age 23, 25, 30, 33, 34 years) participated in this study. The number of participants was chosen based on previous comparable studies (Huber 2015a; Muckli 2015)<sup>2</sup>. Every participant underwent at least six two-hour MRI sessions. A list of all performed scans that are available to download is given in Tab S1.

|              | subj 1 | subj 2 | subj 3 | subj 4 | subj 5 |
|--------------|--------|--------|--------|--------|--------|
| two          | 1      | 1      | 1      | 1      | 1      |
| four         | 2      | 1      | 1      | 1      | 1      |
| five         | 2      | 2      | 0      | 1      | 1      |
| ext vs. flex | 2      | 1      | 1      | 1      | 1      |
| rest         | 3      | 2      | 1      | 1      | 1      |
| 0.5 anat     | 3      | 3      | 3      | 3      | 3      |
| 0.7 anat     | 10     | 10     | 7      | 6      | 3      |

**Table S1.** Number of scans acquired in this study that are available to download. Five volunteers participated in this study. Every participant underwent 5-9 functional scan sessions and 3-10 additional anatomical sessions.

Five additional participants were invited for pilot experiments to optimize parameters for the MRI-sequences, task design and reconstruction parameters (See Fig. S11). An additional 3 participants were invited for pilot experiments to explore the best set of GRAPPA parameters (Kernel size, algorithm type, regularization strength) for image reconstruction.

### Imaging hardware

In this study, we used standard imaging hardware commonly available in more than 50 high-field imaging centers, a MAGNETOM 7T scanner (Siemens Healthineers, Erlangen, Germany) using the vendor-provided IDEA environment (VB17A-UHF). The scanner was equipped with a SC72 body gradient coil (maximum effective gradient strength used here: 47 mT/m; maximum slew rate used: 190 T/m/s). For RF transmission and reception, a volume-transmit\32-channel receive head coil (Nova Medical, Wilmington, MA, USA) was used.

### Tasks

Five different functional tasks were employed across multiple fMRI scan sessions in this study. Schematic depictions of the tasks are given in Fig. S1.

We used multiple, partially redundant experiments that involved the same digits. Our reasons for some choices of the task design were:

- Having multiple tasks with a varying number of fingers involved, provided us with a good spectrum of sensitivity and specificity. As such, experiment A) had 38 averages for each task condition and thus offers highly sensitive results. But since only two digits were involved, the spatial specificity was limited. Experiment

<sup>2</sup>Such numbers of participants are considered reasonable even from the more conservative estimates, as long as every participant is investigated for more than 4 hours (e.g., in visual neuroscience).

C, on the other hand, included only 8 averages of each task condition and thus yields less sensitive results. However, since all five fingers were engaged, the spatial specificity was higher.

- It was not clear that the co-registration across different experiments on different days with different shims can be achieved the same sub-millimeter accuracy of the co-registration within one MRI session. Thus, using the same fingers across different days allowed us to investigate the consistency of the digit representation location despite technical analysis challenges and potential co-registration inaccuracies.
- For some of the resting-state analyses, it was highly beneficial to restrict the analysis to two seed regions only. With two seed regions, it is straightforward to orthogonalize the seed time courses to each other. This allows us to minimize the effect of shared sources of variance such as physiological noise. Therefore, we acquired a task-based reference dataset that involved only two fingers.
- Dependent on how the participant is moving the thumb during the tapping, there can be a residual risk that this movement action also involves wrist motor activity (personal discussion with Dr. James Kolasinski), which is not the case for the index finger. To avoid the risk of wrist activity during thumb tapping, we refrained from using thumb and little finger for the two finger tapping task. Instead, we restricted the two-finger tapping task to index/little finger. Even though they are expected to be represented spatially closer to each other in M1, they are better comparable with respect to the degree of individualization and typical hand movement synergies (Thakur 2008).
- In task B) and C), the rest periods are not equally distributed between every individual finger. This was done in order to allow more trials per finger in a given experiment duration of 34 min, at the cost of potential signal leakage across digit representations. The rest-periods are pseudo randomly omitted between consecutive finger tapings. Here, omitted rest periods are chosen in a way that the response of pairs of fingers can be resampled to match the results of other experiments with fewer engaged fingers. As such, combining the responses of index/middle finger and ring/little finger in the four finger experiment should give rise to similar topographical striping pattern as the two finger experiment. This was helpful as a consistency check across days and tasks.

### MRI acquisition

The timing of magnetization preparation and interleaved acquisition of VASO and BOLD data was done as previously described (Huber 2017). In short, the timing of the acquisitions is: T11/T12/TR=1200/3600/4400 ms across all experiments. The adiabatic VASO inversion pulse is based

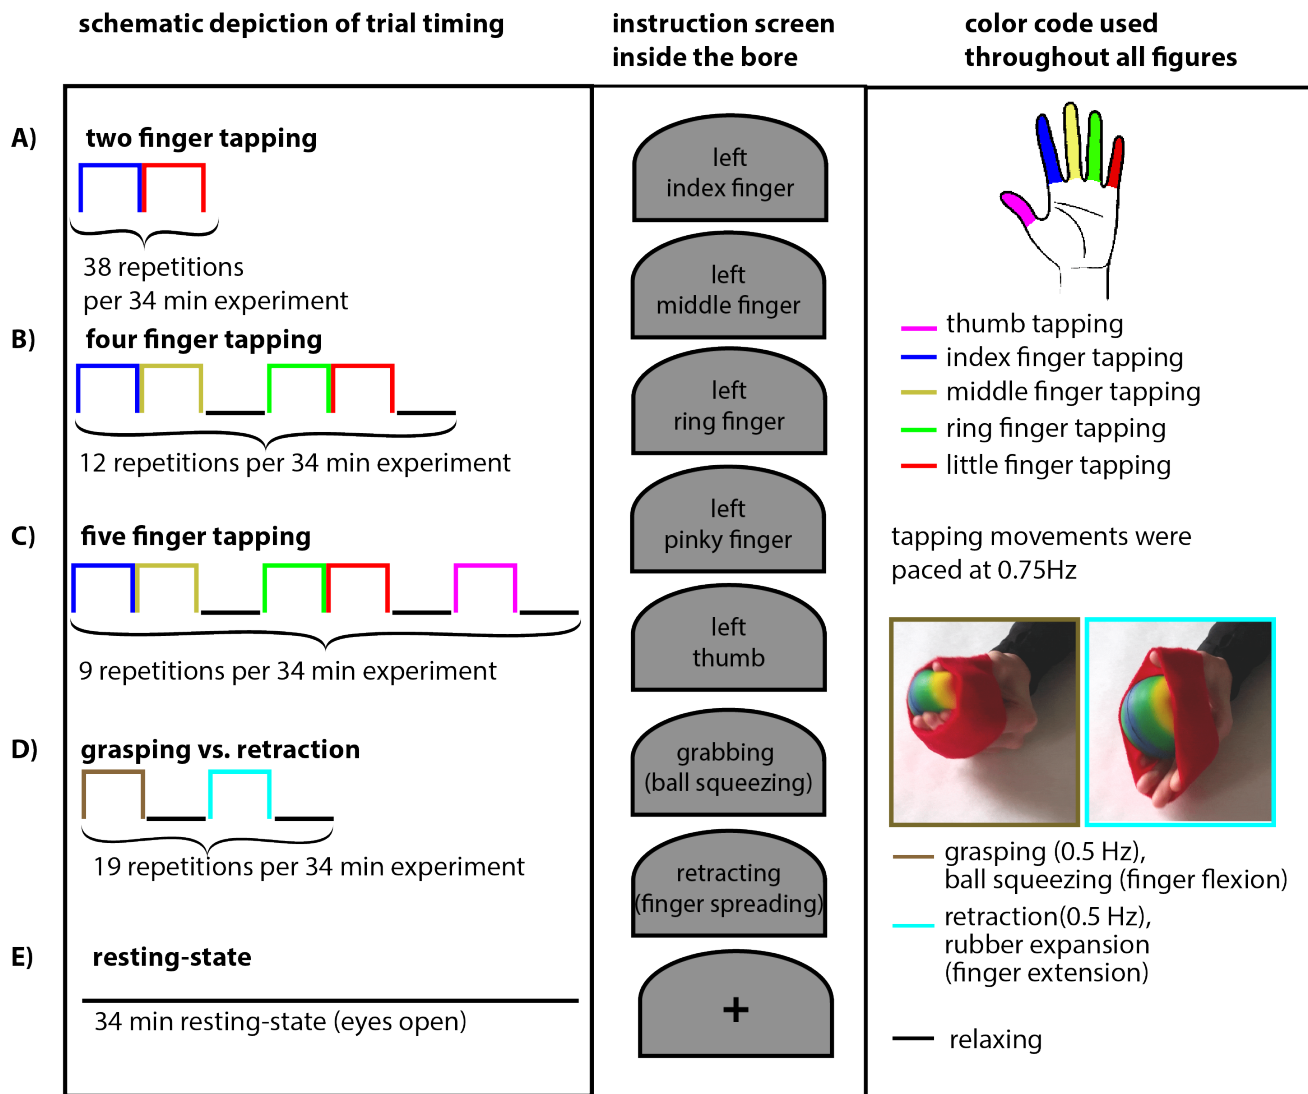

**Figure S1.** Functional tasks used in this study. A) Finger tapping of two fingers; index finger and little finger without rest periods. B) Finger tapping of four fingers; index finger, middle finger, ring finger, and little finger with randomly interspaced rest periods. C) Finger tapping of five fingers; thumb, index finger, middle finger, ring finger, and little finger with randomly interspaced rest periods. D) Grasping of rubber ball and retracting against rubber band with regularly interspaced rest periods. Panel E) shows to resting-state scans. Each activity period (colorful blocks) and each inter-stimulus interval (black line) lasted 26.5 seconds. Every experiment lasted 34 min and was repeated within sessions and across days. Every task condition (tapping of one individual finger, grasping, retraction, and inter-stimulus rest) lasts 30 sec. Tapping movements were paced at a frequency of 0.75 Hz. Instructions of the task were given to the participants via a projector and mirror system inside the scanner bore. All movement tasks were done with the left hand. The right hand was not engaged for any task in this study.

on the TR-FOCI pulse (Hurley 2010), with a duration of 10 ms. Inflow of fresh blood was minimized by the application of a phase skip during the frequency sweep (Huber 2014). Online reconstruction was performed using a combination of standard scanner software with kernel size  $4 \times 3 \times 3$ . Slab-oversampling was applied in the second phase direction with 9.1%. 3D slice aliasing was minimized using a sharp slab-excitation pulse profile with a bandwidth-time-product of 25. A variable flip angle distribution was used to minimize T1-blurring along the second phase encoding direction. The acquisition of the GRAPPA calibration data followed the

FLASH approach as implemented in (Ivanov 2015). In order to minimize T2\*-blurring, no-partial Fourier imaging was applied. This means that we were forced to use a relatively long echo time of 32 ms, trading off SNR for a higher localization specificity. The imaging matrix was  $162 \times 162 \times 24$ , with a nominal resolution of  $0.79 \times 0.79 \times 0.99$  mm<sup>3</sup>. Magnitude images from individual RF receive channels were combined with the sum-of-squares method. Further sequence parameters are given in the protocol pdf of the vendor. As a means of finding anatomical landmarks of high myelination across columns and layers, we acquired 3-10 averages (parts of these

data were acquired in combination with previous studies) of 0.7 mm whole brain MP2RAGE (Marques 2010) and 3 averages of 0.5 mm slab MP2RAGE and Multi-echo FLASH (TEs = 8.5/23.2 ms) data.

### Analysis of functional data

All MR images were motion corrected using SPM12 (Functional Imaging Laboratory, University College London, UK). Volume realignment was done with a 4th-order spline interpolation and realigned volumes were written out using a 4th-order B-spline interpolation. The outermost slices (one at each side) were excluded from the analysis to minimize any residual 3D-EPI related slab fold-over artifacts and reslicing artifacts. Activation GLM analysis was done using FSL FEAT (Version 5.98). Odd and even time points were treated separately and divided by each other to correct for BOLD contaminations in VASO (Huber 2014). The functional percent signal changes were calculated as  $100 \times (S_{activity} - S_{rest})/S_{rest}$  (Fig. S2 left columns of panels respectively). For relative finger dominance analysis, we estimated the finger selectivity as:

$$S_{dominance}^i = \frac{S_{activity}^i}{\sum_{remaining\ fingers} S_{activity}^i} \quad (1)$$

with  $i \in \{thumb, index, middle, ring, little\}$ , while  $S_{activity}^i$  refers to the above percent signal change (middle column in panels of Fig. S2). The grasping and retraction reference was calculated as  $100 \times (S_{grasping} - S_{retraction})/S_{rest}$  and  $100 \times (S_{retraction} - S_{grasping})/S_{rest}$ , respectively.

Alignment across runs and sessions was conducted as part of the motion correction. To avoid the risk of spatial blurring due to additional resampling and imperfect alignment, no distortion correction was applied. Instead, all columnar and laminar analyses were performed directly in the EPI space, which is possible due to the inherent T1 contrast that arises from the inversion-recovery property of the functional VASO sequence (Huber 2017).

### Analysis across laminar and columnar structures

Boundary lines of the gray matter (GM) ribbon to cerebrospinal fluid (CSF) and white matter (WM) were estimated with FreeSurfer (v6.0) with whole-brain MP2RAGE data that had been registered to the functional EPI space with ANTS. These boundaries were used as visual guidance to manually segment GM in EPI space slice-by-slice, as described here. A coordinate system across cortical layers and columns was estimated in LAYNII. LAYNII is an open source C++ software suite for computing layer and column functions. We estimated the depth of equidistantly distributed layers. Note that in the context of fMRI, these estimates of cortical depth do not refer to cytoarchitectonically defined cortical layers. Given that the cortical thickness of the primary motor cortex is 4 mm (Fischl and Dale 2000), the resolution of 0.79 mm used here allows us to obtain 5-7 independent data points across the 20 layers. The number of 20 layers is chosen based on previous experience in finding a compromise between data

size and smoothness (see Fig. S6 in (Huber 2018)). To improve the visibility of finger representation along the central sulcus, spatial smoothing of 0.5 mm was applied across layers. No smoothing was applied across columns. Columnar profiles are generated on unsmoothed data.

### Cortex unfolding using IMAGIRO

For efficient depicting of MRI contrast across the entire central sulcus, we used the program LN\_IMAGIRO of LAYNII to unfold both GM banks of the central sulcus. Fig. S3 depicts this spatial operation schematically.

### Location of double-hand representation is compared to anatomical landmarks

It has been suggested that there are distinct septa of low myelination that provide anatomic landmarks, delineating the borders of major body parts like trunk, face and hand representations (Kuehn 2017). Such anatomical landmarks could be valuable as a reference for comparison with ex-vivo histology data (Ding 2016; Wagstyl 2018) providing insights to the interaction of structure and function. Furthermore, such anatomical landmarks could have the potential to be used as a predictor for the location of individual finger representations without functional localizer experiments. Thus, estimates of T1, T2\*, and phase were extracted in the same columnar coordinate system as the functional data. Fig. S4 depicts all the anatomical contrasts that were used to identify anatomical septa landmarks. Arrows refer to respective locations in the column profiles of Fig. S4 and Fig. 3.

Based on the data shown in Fig. S4, we do not find very clear deviations of anatomical contrasts in and around the hand area that are significantly different from the overall variance across columns. However, we find some indications of changes in T1 that are overlapping with the position of the thumb and index finger representations, both in S1 and in M1 (colorful arrows in Fig. S4), which could be interpreted as indications for septa.

### Reproducibility of results across different fMRI contrasts and task paradigms

The robustness of the double-hand representation in M1 was assessed across multiple fMRI contrasts (BOLD and VASO), tasks (two-finger tapping, four and five finger tapping), as well as in resting-state functional connectivity with S1 (Fig. S5). Across all conditions, we find multiple linearly aligned finger representations in the motor cortex. It is most clearly visible in the VASO results with two fingers tapping as a blue-red-blue pattern. GE-BOLD results show similar patterns but are less clear. In the BOLD results there is more variability in finger representation size and ordering. We attribute this is due to confounding venous signal leakage artifacts.

The repeatability of the double-hand representations and their position across the depth of the central sulcus and compared to the action patches has also been investigated in test-retest experiments across days in the same participants with the same tasks. Fig. S6 depicts that the position of the double-hand representation is highly reproducible across days.

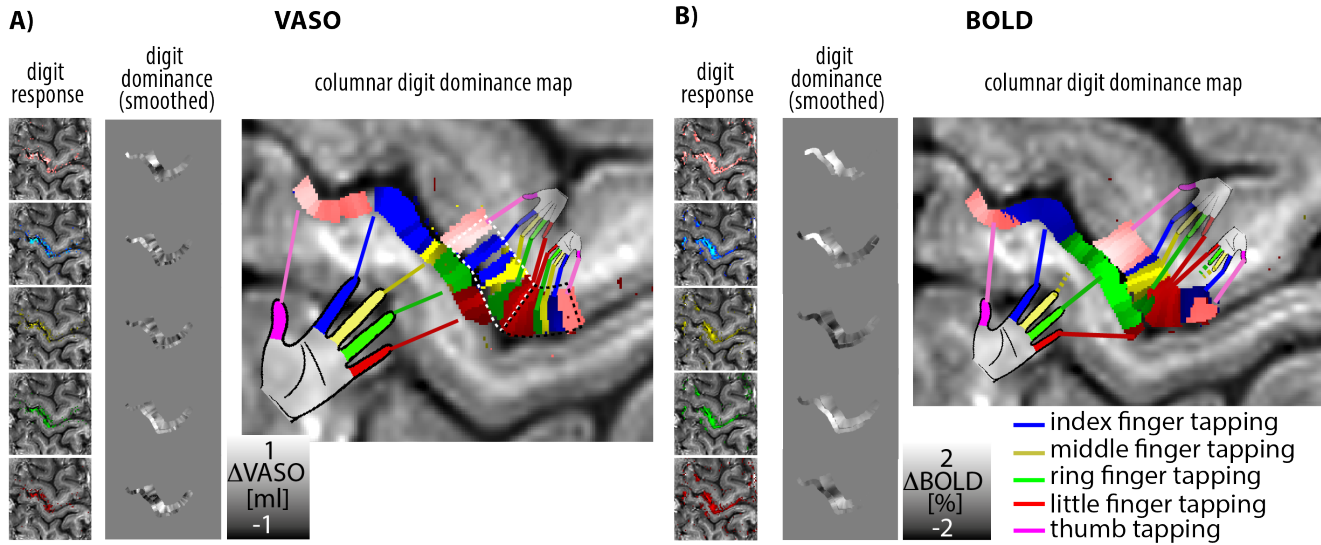

**Figure S2.** Depiction of the steps to generate digit-dominance maps. First, the percent fMRI signal change is calculated for every individual digit (left columns in panel A and B). In the next step, the finger dominance is estimated by dividing the individual digit's response by the sum of all other digits' responses. The resulting relative digit dominance values are smoothed within columns (middle columns in panel A and B). The final topographical maps are generated by overlaying responses of all fingers with different color coding. These are the same type of maps as shown in Fig. 1C and 2A.

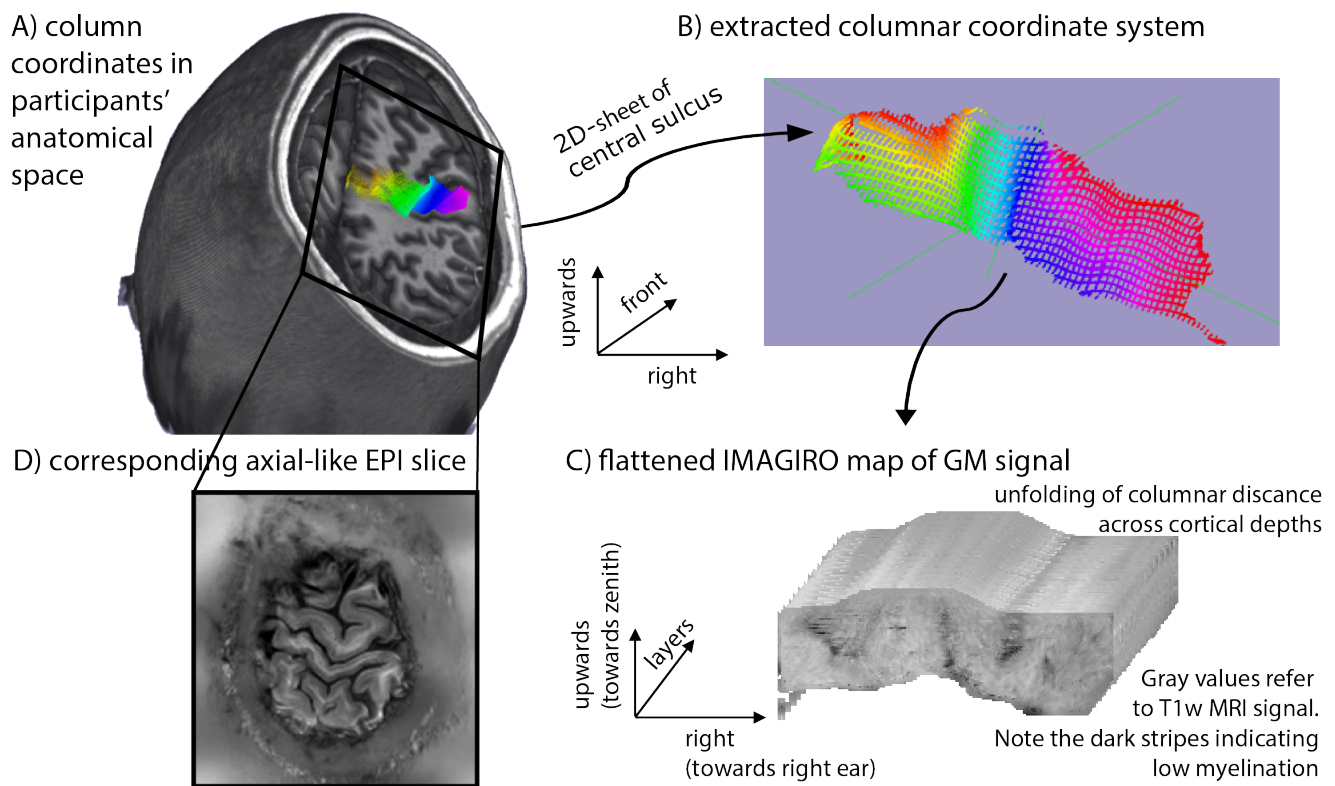

**Figure S3.** Schematic depiction of the unfolding method, IMAGIRO. IMAGIRO (origami written backwards) flattens the participants' folded cortex (A, B) to a 3D-rectangular matrix (C). In the IMAGIRO view, different body parts are represented from left to right. The depth of the central sulcus refers vertical direction. This flattened map can be obtained for different cortical depths (dimension into the page). (D) depicts the orientation of the EPI acquisition in this space for reference.

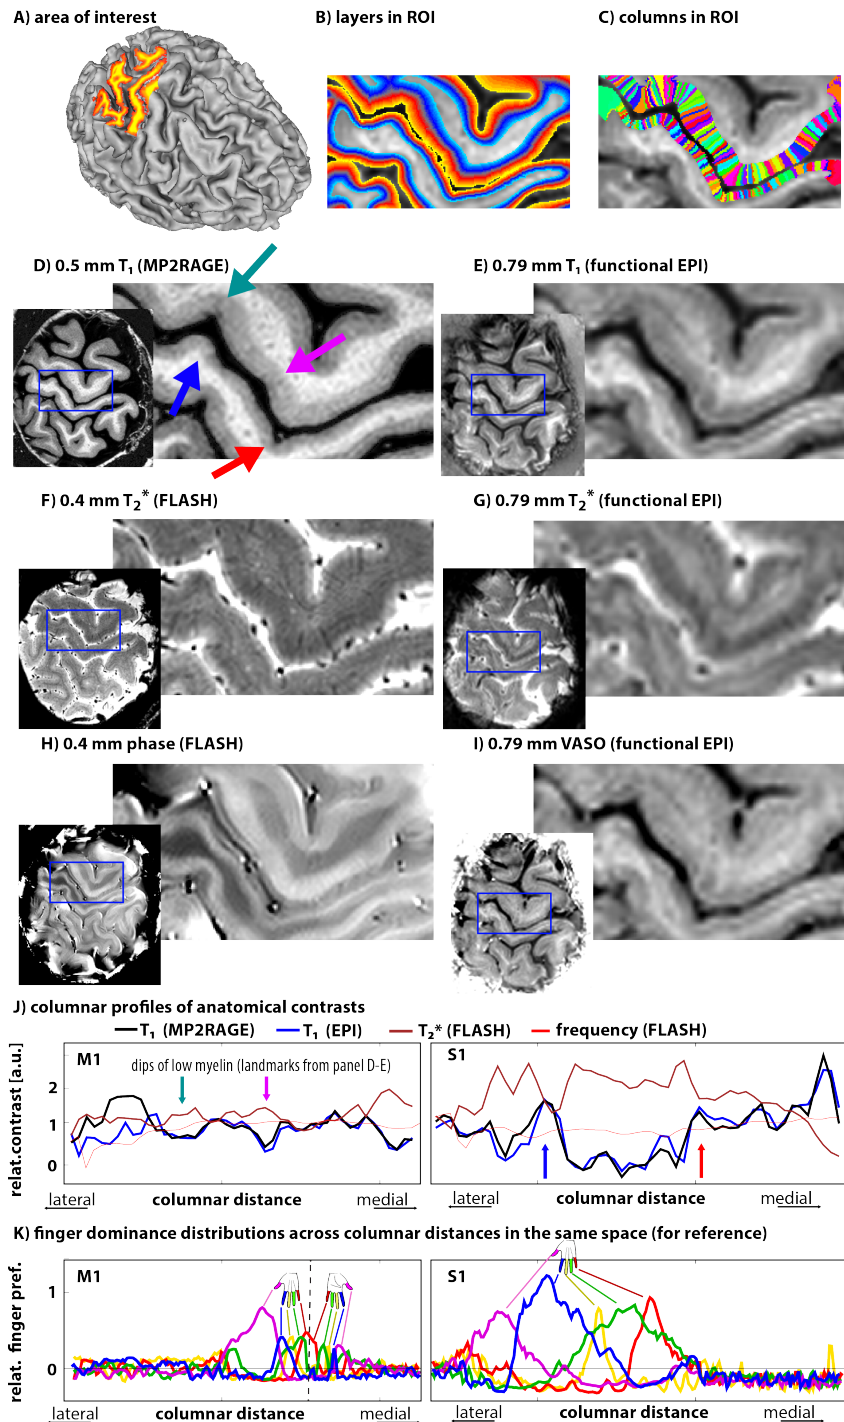

**Figure S4.** Anatomical contrasts used in this study. A) presents visual guidance to the following panels. The region of interest is highlighted in red. B-C) display the cortical coordinate system of layers and columns in the investigated area. D) shows the 0.5 mm quantitative  $T_1$ -MP2RAGE UNI contrasts. E) depicts  $T_1$ -weighted contrast of the functional data. This contrast is used to identify GM/WM and GM/CSF boundaries for cortical depth estimations. F) demonstrates a 0.4 mm quantitative  $T_2^*$  map. This contrast is used to identify voxels of large draining veins. G) exhibits the BOLD EPI intensity. Similar structures and vessels can be seen as in panel F. H) shows a 0.4 mm quantitative FLASH phase map. I) depicts the average VASO intensity. The anatomical contrasts shown in the panels of the figure are used as reference and to find the position of body-part boundaries (panel K).

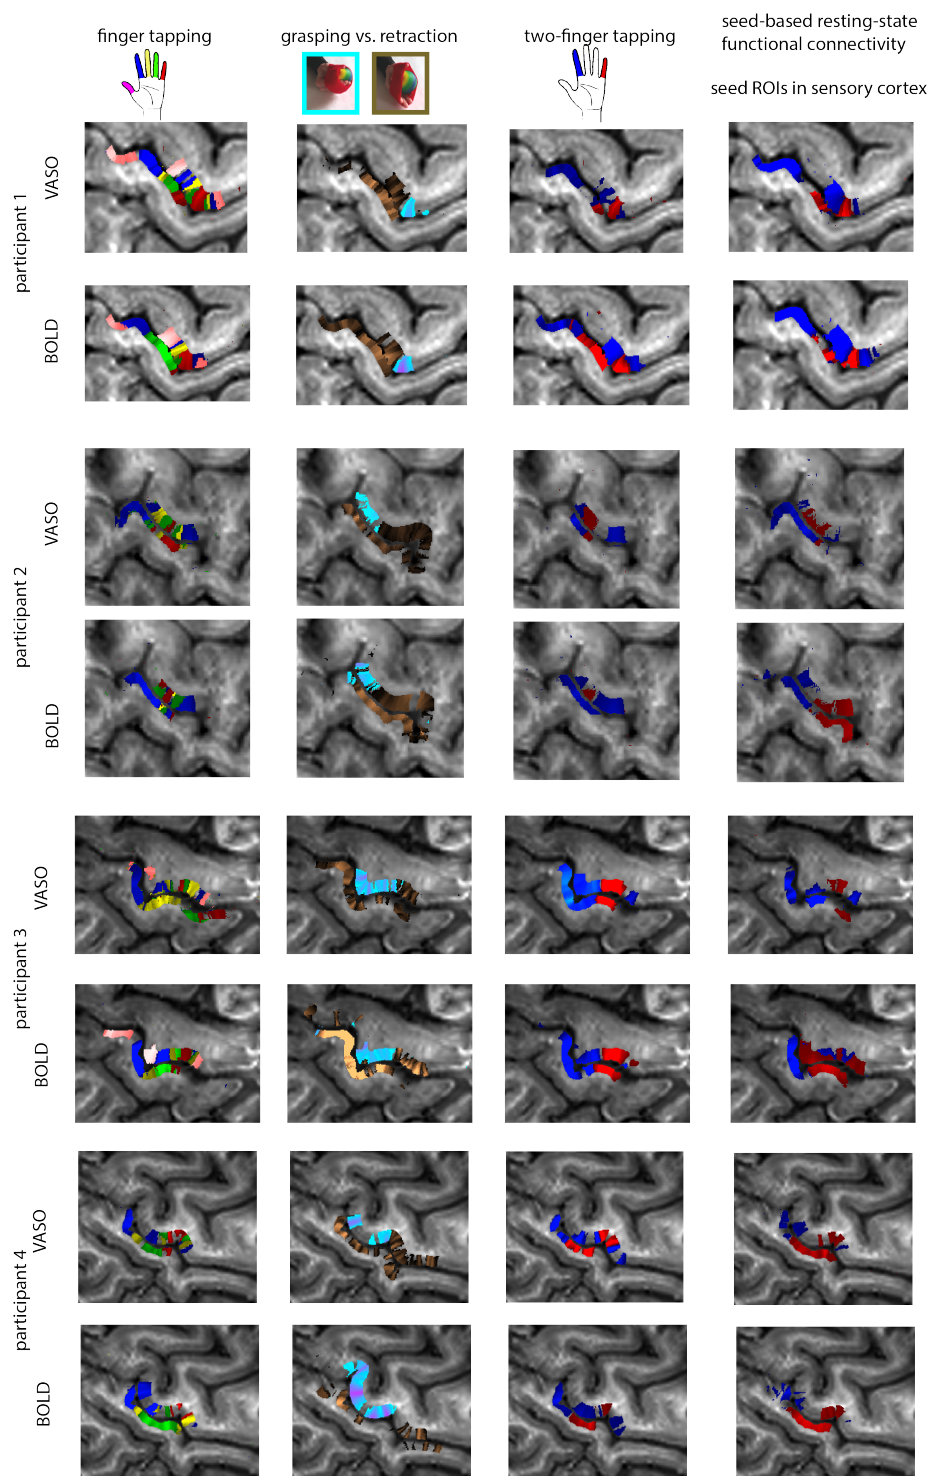

**Figure S5.** Robustness of the digit representations across contrasts and tasks. The maps depicted confirm the reproducibility of the maps shown in Fig. 2,4. Across all contrasts and tasks, multiple mirrored representations of individual fingers can be seen.

## test-retest across days with the same task in the same participant

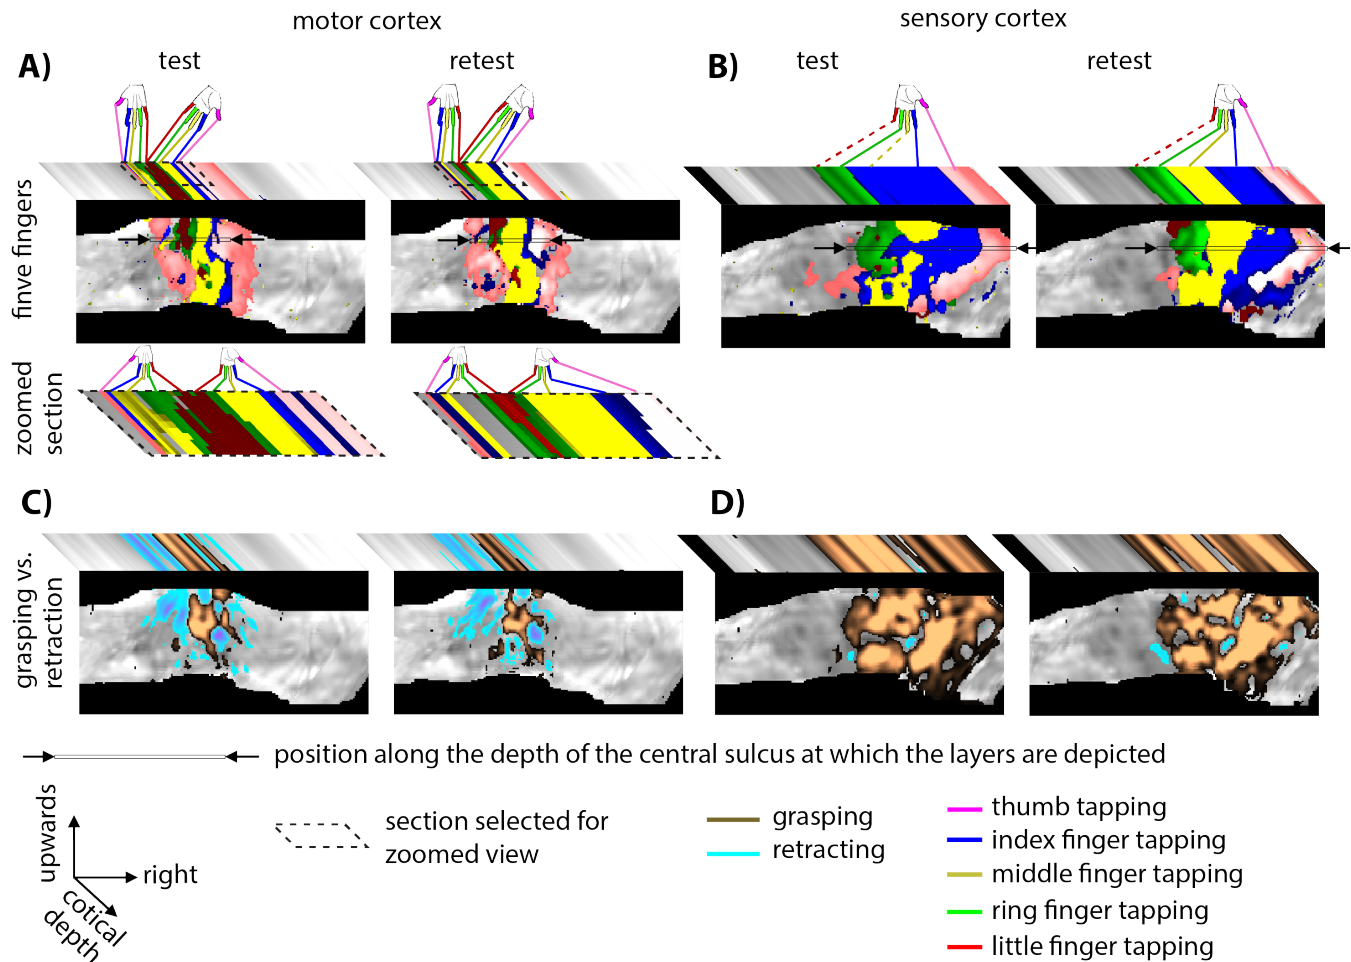

**Figure S6.** Test-retest results of the double-hand with the same participant and the same tasks across different days. Every activation map shown here refers to an independent experiment of 64 min (two times 34 min) on one day. The IMAGIRO maps depict the activation of the middle cortical layer across the entire central sulcus. At one position along the depth of the central sulcus (black arrows), the activation is shown across all cortical depths. A) It can be seen that the double-hand representation is reproducible across days. B) For the sake of comparison of the hand size, the results of the sensory cortex are shown as well. Panels C)-D) depict the corresponding grasping vs. retraction preferences. In the motor cortex it can be seen that the two hand representations refer to different action preferences.

### Time courses

The grasping vs. retraction task does not directly isolate the action patches shown in Figs 1-3, S8. It is important to point out that both patches in the primary motor cortex show increased activity during both action tasks. The individual patches could be identified based on their differential activity strengths only (Fig. S7).

### Resting-state functional connectivity along the lateral position across the central sulcus

We used resting-state functional connectivity to investigate the organization principle across the lateral position of the central sulcus and the depth of the central sulcus. This is done to confirm the task results shown in Fig. 3 with independent resting-state data. Topographical patterns of functional connectivity were investigated by means of resting-

state connectivity kernels. In this method, the correlation of the fluctuations of any given voxel is compared to its surroundings. Then, the spatial pattern of the resting-state correlation are averaged for every voxel in M1. This procedure is done across superficial and deeper layers (Fig. S8A) in the IMAGIRO coordinate system. We find that the correlation within columns is larger than within layers (purple arrows in Fig. S8B-C). This confirms that the topographical representation alignment is more columnar organized than laminar organized. We find that the overall connectivity is not circular across columnar dimensions. Instead, columnar structures have a higher functional connectivity across the depth of the central sulcus than across the lateral dimension (Blue ellipses have larger height than width in Fig. S8B-C). This confirms that there is a higher connectivity within body part representations than across body part representations. We find that



### time courses of fMRI signal change in ROIs that have grasping or retraction preference

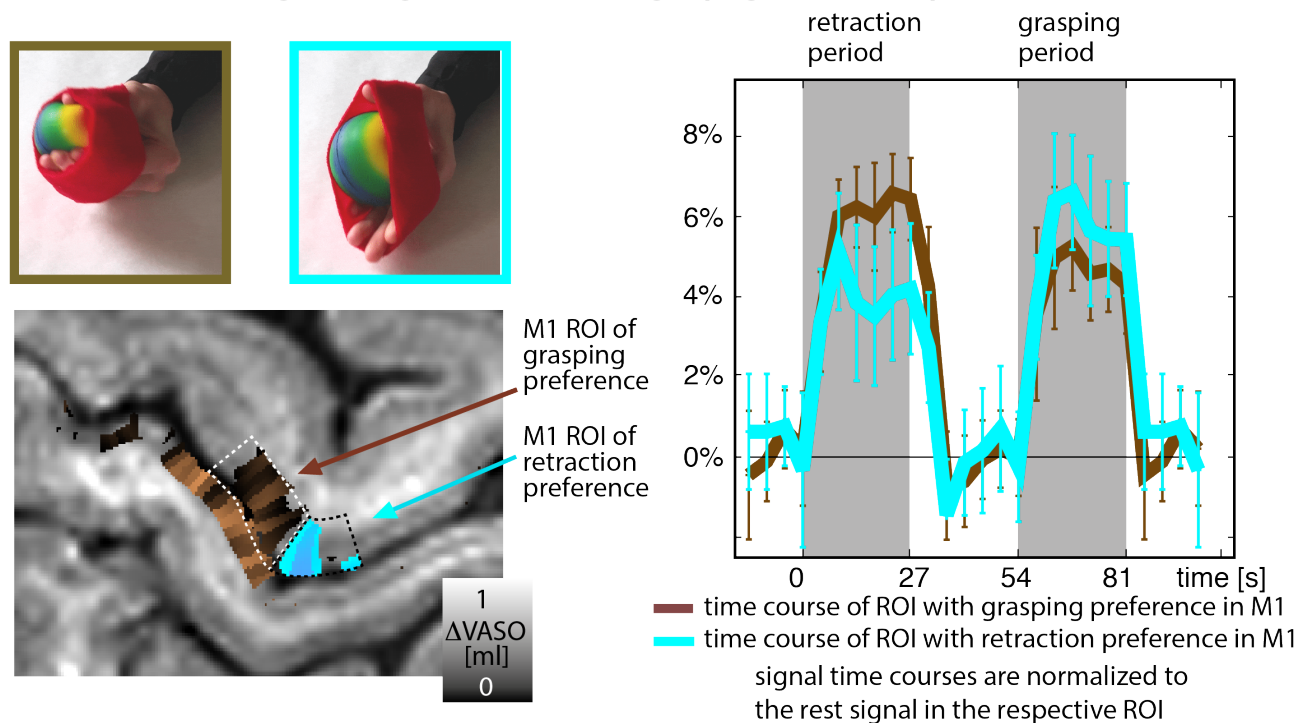

**Figure S7.** Time courses grasping vs. retraction task. Data refer to averages across all trials in two 34 min experiments. The error-bars refer to the standard deviation across trials. The time course shows that both action patches (retraction and the grasping patch) become active during both motor tasks. Their respective activity, however, is modulated based on the specific motor action conducted.

deeper layers show slight deviations of an exponential decay of functional connectivity across columnar distance. Instead, we find a reduction of functional connectivity in a center-surround pattern. This is despite the fact that deeper layers have larger lateral vessels than superficial layers (Fig. S8D). The fact that deeper layers show less overlap of neighboring body parts confirm the task results shown in Fig. 3C. One potential origin (among others) of the sharper body part representation might be associated with previously described phenomena of surround inhibition in M1.

#### Variability of result across depth of the central sulcus

Multiple finger representations across multiple action patches show results along one tilted axial-like orientation (Fig. 2, S5). To investigate the repeatability of this result across the depth of the central, all corresponding maps were transformed into the unfolded IMAGIRO view (Fig. S9). Across the depth of the central sulcus, we find multiple repeated action patches. Each and every one of those patches prefer to either grasping or retraction actions and contains representation of all digits. They are aligned in a mirrored fashion along the lateral dimension of the central sulcus.

It is important to note that all of the results shown in Figs. 1-4, S1-S12 refer to the Brodmann area BA4a which is the superior portion of M1 on the precentral bank of the central sulcus close to the crown of the precentral gyrus. This part of the primary motor cortex is not to be confused with the Brodmann area BA4p, which is located deeper within the

central sulcus. It has been shown with PET that both BA4p and BA4a represent movements of the fingers (Geyer 1996). It should be noted, that the double-hand representation found in this study does not refer to the two hand representations across BA4a and BA4p. Fig. S10 depicts the alignment of the respective sub areas of the primary motor cortex.

#### Pilot experiments to determine the cortical hemisphere with the optimal sensitivity

Five participants were invited to participate in pilot experiments to identify whether it is optimal to focus on the left or the right hand and hemisphere. We found that due to the non-spherical shape of human head, the  $B_1^+$ -fields are higher in the right motor cortex compared to the left motor cortex (Fig. S11). This effect is due to the fact that at 300 MHz, the period of oscillation is comparable to the time that it takes for the radio-field to travel with the speed of light through the head, resulting in destructive interference. Without a parallel transmit system available, we thus decided to focus on the right motor cortex during left hand finger movements.

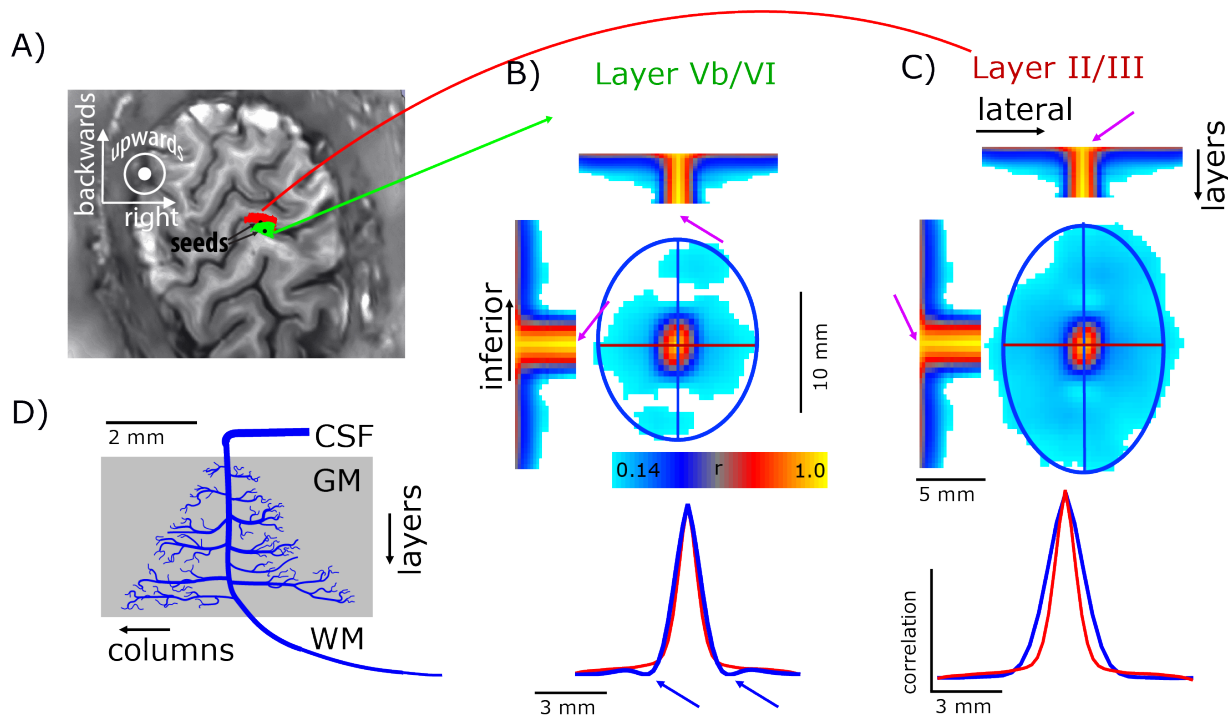

**Figure S8.** Topography of functional connectivity measured across cortical depth by means of connectivity kernels. Panel A) schematically depicts one iteration of a local connectivity estimation. For any seed (black dot) the functional connectivity is estimated for its surrounding (green and red areas respectively). The mean connectivity kernels are shown for deeper and superficial layers in panels B-C). The red and blue lines refer to cross-sections of the kernel along the central sulcus depths and along the lateral position. The result in this figure show that there is a higher functional connectivity within body part representation than across body part representations (blue outline is a vertical ellipse rather than a circle). We find that deeper layers show less overlap of body parts than the upper layers (side lobes at blue arrows in panel B). This is visible despite the larger potential vascular bias in deeper layers compared to superficial layers, as indicated by the vein drawing shown in panel D (reproduced from Duvernoy 1981).

## action patches across the depth of the central sulcus

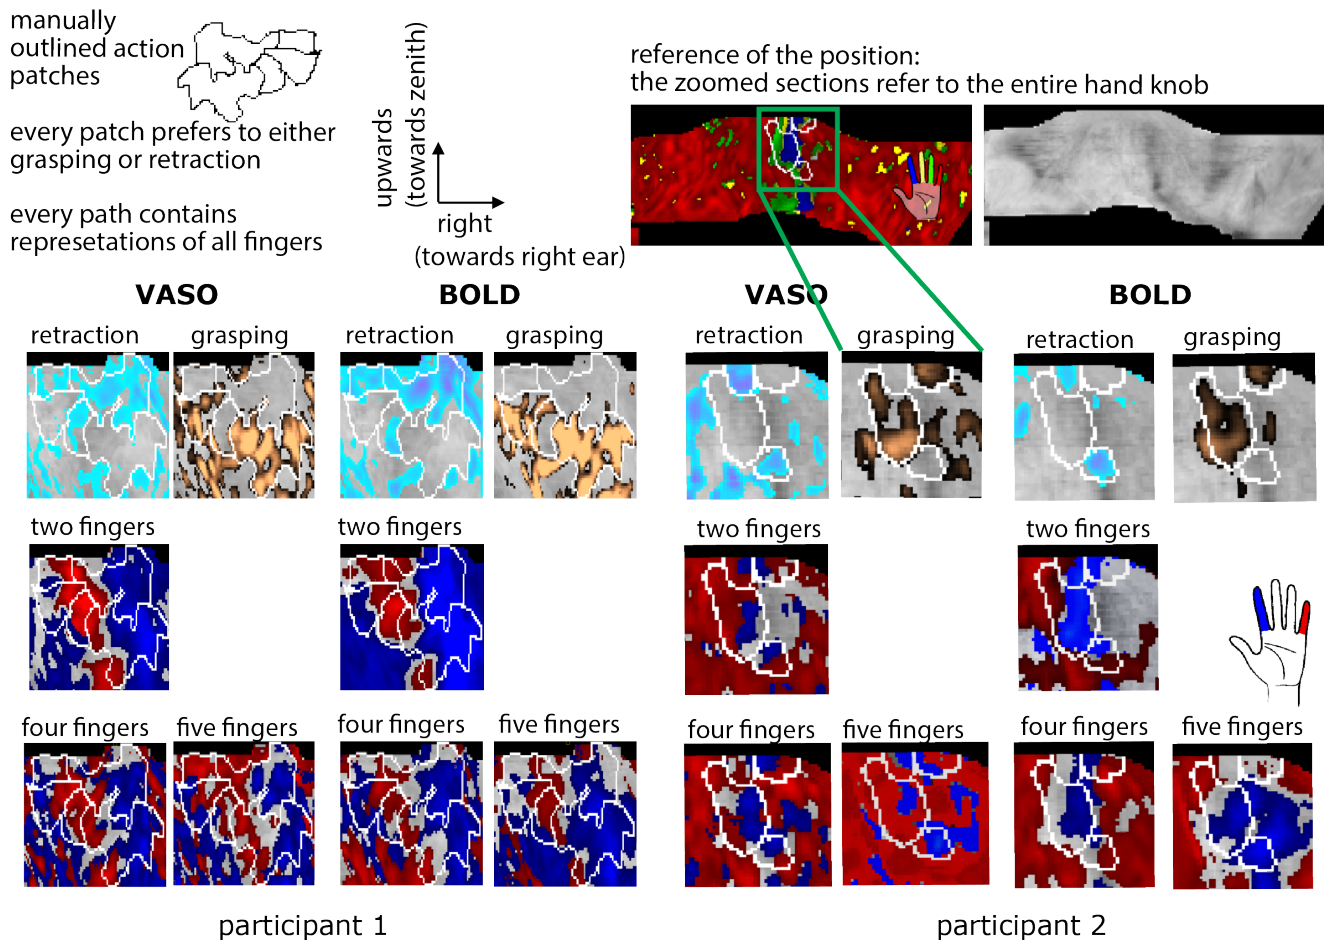

**Figure S9.** Action patches across the depth of the central sulcus. Results are shown for two participants. For the sake of comparability, we focus on two fingers only; index and little finger. Those fingers were moved during three task classes across different scan sessions. Therefore, they can be used to estimate the repeatability across days. In the bottom rows, we aim to show the repeatability of the results across experiments with different tasks. A very similar red-blue pattern is visible for index and little finger representations across all experimental tasks. Every grasping and retraction patch contains both, an area with preferred index finger preference and an area with preferred little finger preference, respectively.

### double-hand location in BA4a

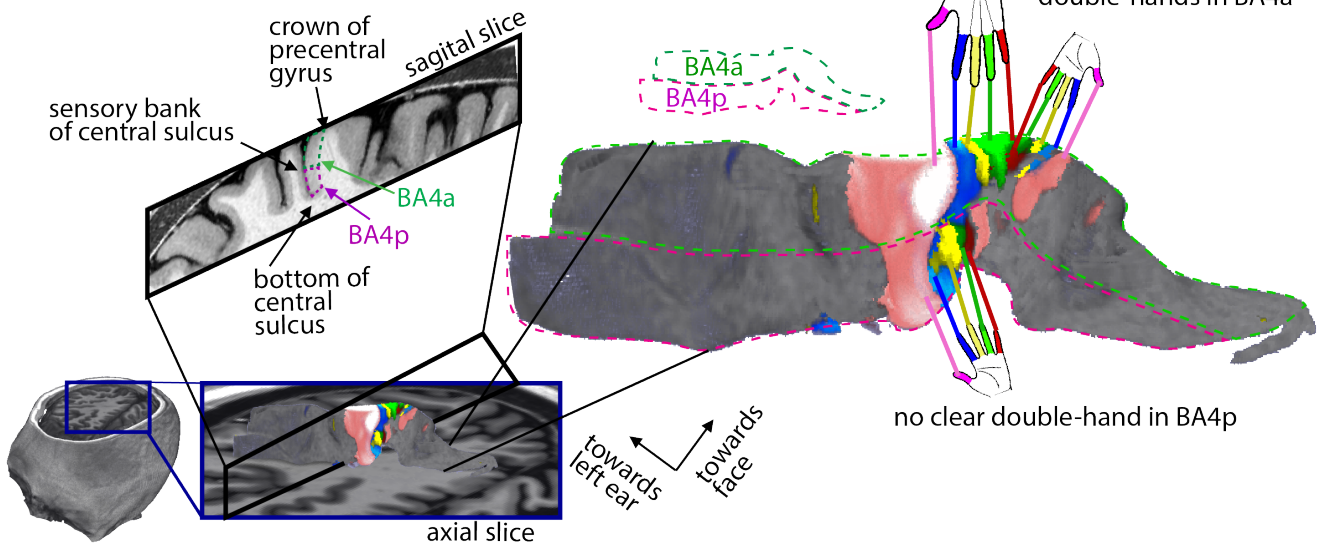

**Figure S10.** Position of the double-hand representation across the sub areas BA4p and BA4a. The double-hand representation in a mirrored finger pattern found in this study is located with in BA4a. Deeper in the central sulcus, in BA4p, an additional hand representation can be found. The hand representation in BA4p is aligned with the superior hand representation in BA4a without a clear mirrored pattern.

### A) tSNR resting-state fMRI across participants

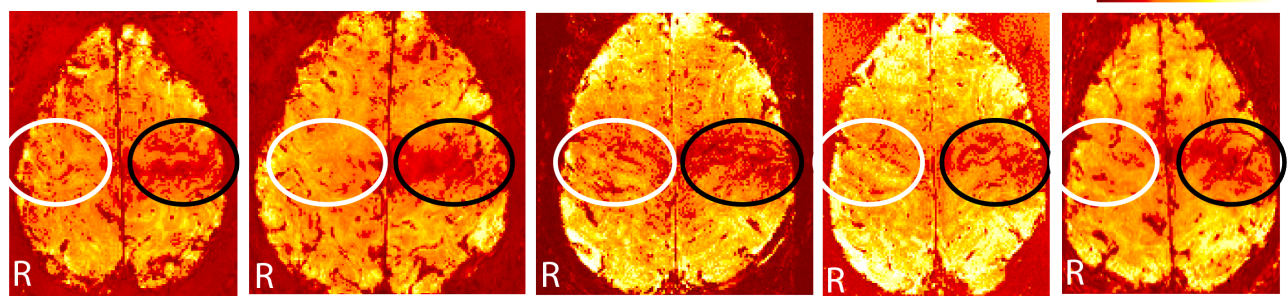

### B) $B_1^+$ -field across participants

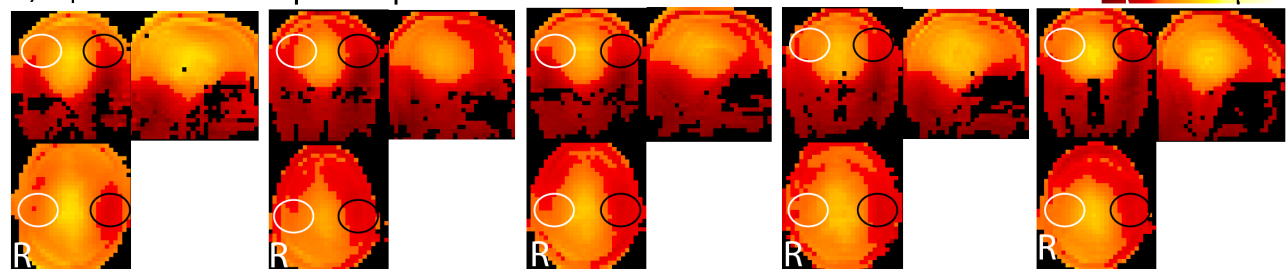

**Figure S11.** Comparison of sequence optimization of the left and the right sensorimotor cortex. A) tSNR maps of the functional VASO contrast show that the right sensorimotor cortex (white ellipses) has a clearly higher signal stability than the left sensorimotor cortex (black ellipses). This made us choose the right sensorimotor cortex during left-hand motor tasks in this study. B) We believe the lower sensitivity in the left sensorimotor cortex is due to asymmetric RF-interference artefacts in the presence of a non-spherical object (human head) in the RF-coil.
